# 1 **A versatile synaptotagmin-1 nanobody provides perturbation-free live** 2 **synaptic imaging and low linkage-error in super-resolution microscopy**

3  
4 Karine Queiroz Zetune Villa Real<sup>1,2,8</sup>, Nikolaos Mougios<sup>1,2,8</sup>, Ronja Rehm<sup>1,8</sup>, Shama Sograte-  
5 Idrissi<sup>1,2,8</sup>, László Albert<sup>1,2</sup>, Amir Mohammad Rahimi<sup>1,2</sup>, Manuel Maidorn<sup>1,2</sup>, Jannik Hentze<sup>1,2</sup>,  
6 Markel Martínez-Carranza<sup>3</sup>, Hassan Hosseini<sup>4</sup>, Kim-Ann Saal<sup>1</sup>, Nazar Oleksiievets<sup>5</sup>, Matthias  
7 Prigge<sup>4,6</sup>, Roman Tsukanov<sup>5</sup>, Pål Stenmark<sup>3,9</sup>, Eugenio F. Fornasiero<sup>1,9</sup>, Felipe Opazo<sup>1,2,7,9,10</sup>

8

9 <sup>1</sup>Institute of Neuro- and Sensory Physiology, University Medical Center Göttingen, 37073  
10 Göttingen, Germany.

11 <sup>2</sup>Center for Biostructural Imaging of Neurodegeneration (BIN), University Medical Center  
12 Göttingen, 37075 Göttingen, Germany.

13 <sup>3</sup>Department of Biochemistry and Biophysics, Stockholm University, SE-10691 Stockholm,  
14 Stockholm, Sweden.

15 <sup>4</sup>Research Group Neuromodulatory Networks, Leibniz Institute for Neurobiology, 39118  
16 Magdeburg, Germany

17 <sup>5</sup>III. Institute of Physics - Biophysics, Georg August University, 37077 Göttingen, Germany.

18 <sup>6</sup>Center for Behavioral Brain Sciences, 39118 Magdeburg, Germany.

19 <sup>7</sup>NanoTag Biotechnologies GmbH, Rudolf-Wissell-Straße 28a, 37079 Göttingen.

20 <sup>8</sup>These Authors contributed equally to this work

21 <sup>9</sup>Corresponding Authors: [fopazo@gwdg.de](mailto:fopazo@gwdg.de); [efornas@gwdg.de](mailto:efornas@gwdg.de); [stenmark@dbb.su.se](mailto:stenmark@dbb.su.se)

22 <sup>10</sup>This Author supervised the work

23

24

## 25 **Abstract**

26 Imaging of living synapses has relied for over two decades on the overexpression of synaptic  
27 proteins fused to fluorescent reporters. This strategy changes the stoichiometry of synaptic  
28 components and ultimately affects synapse physiology. To overcome these limitations, here  
29 we introduce a nanobody that binds the calcium sensor synaptotagmin-1 (NbSyt1). This  
30 nanobody functions in living neurons as an intrabody (iNbSyt1) and is minimally invasive,  
31 leaving synaptic transmission almost unaffected, as demonstrated by the crystal structure of the  
32 NbSyt1 bound to synaptotagmin-1 and by our physiological data. Its single-domain nature  
33 enables the generation of protein-based fluorescent reporters, as we showcase here by  
34 measuring spatially-localized presynaptic Ca<sup>2+</sup> with an NbSyt1-jRCaMP8 chimera. Moreover,  
35 its small size makes the NbSyt1 ideal for various super-resolution imaging methods. Overall,  
36 NbSyt1 is a versatile binder that will enable imaging in cellular and molecular neuroscience at  
37 a higher precision than possible in the past, over multiple spatiotemporal scales.

38

## 1 Introduction

2           Neuronal communication strongly relies on the molecular machinery responsible for  
3 the accurate release of neurotransmitters. For this crucial step in neuronal communication,  
4 neurotransmitter-filled synaptic vesicles (SVs) fuse to the plasma membrane upon  $\text{Ca}^{2+}$  entry  
5 through activated voltage-gated channels following an action potential. The rapid fusion of the  
6 membranes from SVs to the plasma membrane occurs through a set of proteins known as the  
7 soluble N-ethylmaleimide-sensitive-factor attachment receptors or SNAREs. The SNAREs  
8 located at the plasma membrane form a four-helix bundle together with the SNAREs present  
9 at the SVs<sup>1,2</sup>. The interaction of these alpha-helices is progressive, and at some point, this  
10 complex provides sufficient energy for the fusion of the SVs with the plasma membrane,  
11 releasing the neurotransmitters' load to the synaptic cleft. Interestingly, this SNARE-zipper  
12 mechanism for SVs fusion is regulated by  $\text{Ca}^{2+}$  in a complex manner. At central synapses, the  
13 putative protein responsible for the  $\text{Ca}^{2+}$ -dependent regulation of synaptic release is  
14 Synaptotagmin 1 (Syt-1), which is present in several copies on each SV<sup>3,4</sup>. Syt-1 has two  
15 calcium-binding domains (C2A and C2B). Although the calcium dependency and Syt-1  
16 involvement in evoked neurotransmitter release are generally not questioned, the exact  
17 molecular mechanism of how Syt-1 regulates the SNARE complex and SV fusion is a topic of  
18 fervent research<sup>5-8</sup>.

19           Remarkably, several questions remain to be answered, including which is the exact  
20 molecular target of Syt-1, what is the relative involvement of the two calcium binding domains,  
21 and ultimately which are the different steps and interactors of Syt-1. It is known for example  
22 that the C2 domains of Syt-1 interact with negatively charged membranes in a  $\text{Ca}^{2+}$ -dependent  
23 manner<sup>9,10</sup>, although also a  $\text{Ca}^{2+}$ -independent interaction has been observed *in vitro* for  
24 membranes containing phosphatidylinositol<sup>11</sup>. Several molecular mechanisms for Syt-1 have  
25 been proposed including the formation of rings on presynaptic membranes in the absence of  
26  $\text{Ca}^{2+}$ , which might prevent SNARE-mediated SV fusion<sup>12</sup>. One other model suggests that Syt-  
27 1 might stabilize a still yet little defined partially-assembled SNARE complex between the SV  
28 membrane and the plasma membrane and that this interaction with a partially-assembled  
29 complex is resolved in the presence of  $\text{Ca}^{2+}$ , thus favoring fusion<sup>13,14</sup>. An additional model  
30 suggests that Syt-1 might specifically modulate the interaction with  $\text{PIP}_2$ -containing  
31 membranes promoting changes in membrane bending in a  $\text{Ca}^{2+}$ -dependent manner, thereby  
32 promoting fusion<sup>9,15</sup>.

33           We are persuaded that the heterogeneity of the experimental results obtained and the  
34 difficulty in understanding the molecular function of Syt-1 depend in part on diverging findings  
35 obtained *in vitro* and in cultured neurons<sup>16</sup>, and are in part related to the difficulty of studying  
36 this molecule when expressed at the correct stoichiometry<sup>17,18</sup>. For these reasons, here we  
37 aimed to develop a custom molecular tool that would allow us to manipulate and monitor the  
38 activity and the function of Syt-1 without adding a tag (e.g., EGFP) nor changing its  
39 stoichiometry in the cell, following a number of criteria.

40           We set out to develop a small probe able to bind to an accessible domain of Syt-1, with  
41 a strong affinity and high specificity, ideally, even if Syt-1 is engaged with the SNAREs,  
42 calcium or membranes in the crowded volume of an active synaptic bouton. The probe should  
43 be small to minimize the linkage error and retain its binding and specificity even after chemical  
44 fixation, which is typically needed for various advanced microscopy techniques, but it should

1 also be functional in living neurons to monitor native Syt-1 location and function with minimal  
2 interference on Syt-1 physiological tasks.

3 We present here the successful development and characterization of an alpaca single-  
4 domain antibody, also known as nanobody (Nb), that remarkably fulfills most of our  
5 abovementioned criteria, and therefore it appears as an ideal probe to study living synapses and  
6 Syt-1 molecular physiology. This Nb is able to bind with high affinity and specificity to the  
7 C2A domain from rat Syt-1 and after obtaining the crystal structure of the Nb bound to rat C2A  
8 domain, we predicted that the Nb should significantly minimize the linkage error when directly  
9 conjugated to fluorophores and it should also impose a minimal effect on native Syt-1 activity.  
10 Due to these already favorable features, we decided to continue engineering this monovalent  
11 nanobody as an ideal probe to stoichiometrically reveal Syt-1 in various high- and super-  
12 resolution microscopy techniques like SIM, STED, DNA-PAINT, and Expansion Microscopy  
13 (ExM). In addition, we tested and demonstrated its minimal perturbation when expressing this  
14 Nb in living primary neurons (as intrabody), resulting in a flexible tool to label live synapses  
15 and follow synaptic vesicles. Finally, we used this specific binder to position the sensitive  
16 calcium sensor jRCaMP8<sup>19</sup> directly on pre-synapses, allowing a highly localized calcium  
17 detection and fast response to evoked and spontaneous activity without genetic manipulation  
18 of synaptic proteins. We conclude that this Nb is a highly versatile tool for use in living  
19 neurophysiology studies as in conventional and super-resolution imaging techniques. We  
20 expect this Nb to be instrumental in tracking synaptic physiology and dissecting the molecular  
21 role of Syt-1 in neuronal communication.

22

## 23 **Results**

### 24 **Selection and initial characterization of potential binders to Syt-1.**

25 For the selection of nanobodies against Syt-1 we immunized alpacas with enriched rat  
26 synaptosomes. Five months after the immunization protocol, we extracted the peripheral blood  
27 mononuclear cells (PBMCs) from 100 ml of blood. After total RNA extraction from the  
28 PBMCs we generated a cDNA library of Nbs and cloned them into a phagemid to later screen  
29 for binders using phage-display (Supp. Fig. 1a). Before performing the phage-display, we  
30 verified if these animals had generated heavy-chain antibodies against the cytosolic (amino  
31 acids 97-421) domain of rat Syt-1 (rSyt-1<sub>(97-421)</sub>). For this, we first removed conventional  
32 immunoglobulins (IgG1) that might also recognize this domain and enriched for heavy-chain  
33 antibodies (IgG2 & IgG3) from the plasma of the immunized alpacas (Supp. Fig. 1b). These  
34 IgG2 and IgG3 were used for the detection of rSyt-1<sub>(97-421)</sub> coated as antigen in an ELISA plate  
35 (Supp. Fig. 1c). The ELISA result suggested that heavy chain antibodies binding rSyt-1<sub>(97-421)</sub>  
36 were present in the serum although we used a complex antigen mixture for immunization  
37 (synaptosomes). These results encouraged us to proceed with phage-display screening.

38 After three rounds of phage display screening (biopanning) using the whole  
39 immobilized cytosolic rSyt-1<sub>(97-421)</sub>, we obtained five clones with strong positive signals on an  
40 ELISA. Although these clones have relatively similar complementary determining region 1  
41 (CDR1), they all show significant differences in their CDR2s and CDR3s (Fig.1a, Supp. Fig.  
42 1d). After subcloning all five clones into a mammalian expression vector, only two clones (A51  
43 and A91) resulted in reasonable protein yields (>20 mg/L).

1           For further validation, NbA51 and NbA91 were directly conjugated with fluorophores  
2 for testing them in immunofluorescence (IF) assays. Initially, COS-7 fibroblasts were  
3 transfected with plasmids coding for the full-length rat Syt-1 fused to EGFP. After 24h, cells  
4 were chemically fixed using paraformaldehyde and IF was performed using 50 nM of  
5 fluorescent nanobodies. Both clones displayed specific signals that were detected only on  
6 EGFP-positive cells, suggesting that both clones are able to detect rat Syt-1 and that their  
7 epitopes seem not to be affected by aldehyde fixation (Fig. 1b). In order to understand the  
8 specificity of these candidates, a dot-blot assay with purified rSyt-1<sub>(97-421)</sub> and rSyt-2<sub>(97-422)</sub>  
9 suggest that both candidates bind specifically to rSyt-1 and not rSyt-2 (Supp. Fig. 2). We  
10 carried on an additional validation step to verify their IF performance on rat primary  
11 hippocampal cultures. At this point we reasoned that if the nanobody would bind efficiently in  
12 a cell context situation, where Syt-1 is in close proximity with several other interacting  
13 molecules, it would thus be the one providing the higher signal-to-noise ratio (SNR) likely  
14 because has a higher affinity or is able to find more epitopes. While both candidates tested  
15 displayed the classical punctuated pattern of synapses expected in these primary neurons, by  
16 closer inspection the candidate NbA51 provided images with negligible level of background  
17 staining in cell bodies of neurons and astrocytes. Due to this, we decided to continue to work  
18 with the NbA51 and rename it NbSyt1.  
19

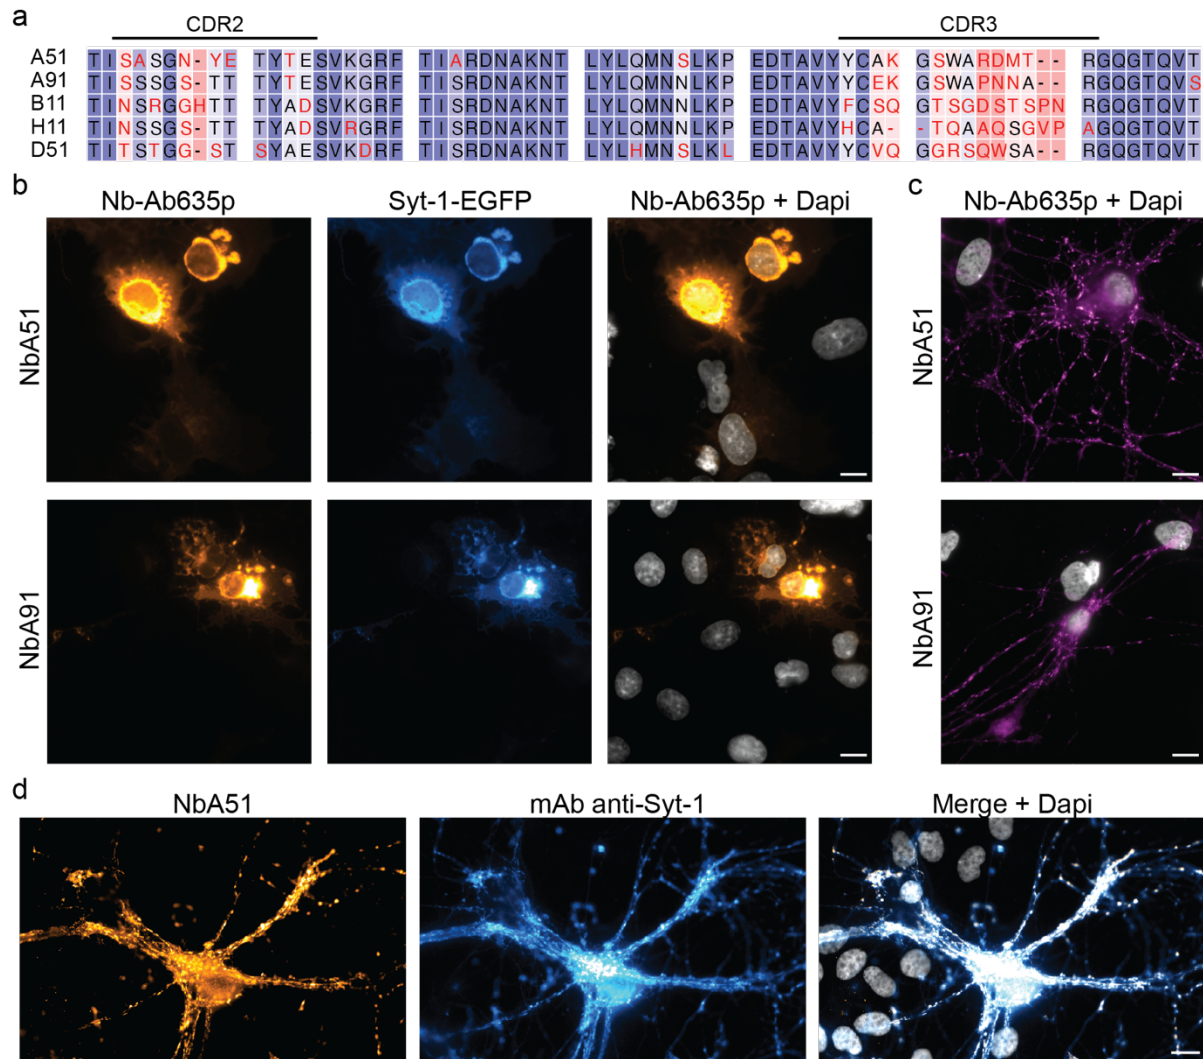

1  
2 **Figure 1. Selection of nanobodies against Synaptotagmin 1.** (a) Alignment of five nanobody  
3 candidates selected for binding *in vitro* to rSyt-1<sub>(97-421)</sub>. Complementary determining regions (CDR) 2  
4 and 3 show the maximum degree of variability. (b) Cos-7 cells transiently transfected with rat Syt-1  
5 fused to EGFP (Syt1-EGFP) stained with NbA51 and NbA91 directly labeled with AbberiorStar635p  
6 (Nb-Ab635p). Scale bar 10  $\mu$ m. (c) Hippocampal primary culture stained with Nb-Ab635p. Scale bar  
7 10  $\mu$ m. (d) Co staining of primary neuronal culture using the NbA51-Ab635p and a conventional  
8 monoclonal antibody revealed by polyclonal secondary antibody conjugated to Cy3. Scale bar 10  $\mu$ m.  
9 Nuclei are stained with DAPI and depicted in greyscale.

10  
11 To further confirm the specificity of NbSyt1, we performed the co-staining of primary  
12 hippocampal neurons using a directly labeled version of the nanobody and a conventional  
13 monoclonal antibody anti-Syt-1, which displayed virtually a complete colocalization on  
14 confocal microscopy (Fig. 1d), confirming that this NbSyt1 appears to be also specific in a  
15 neuronal environment. Next, we decided to understand more precisely where the NbSyt1 binds  
16 within rSyt-1<sub>(97-421)</sub>. For this, we produced various fragments of rSyt-1<sub>(97-421)</sub> and performed a  
17 dot-blot assay. The analysis of these experiments indicated that the NbSyt1 binds to the C2A  
18 calcium-binding domain of Syt-1. However, if the putative protein linker between C2A and  
19 C2B is removed (fragment-4 & fragment-6, Supp. Fig. 2b) the affinity was strongly reduced or  
20 completely lost. This finding motivated us to proceed with the crystallization of the complex  
21 NbSyt1-Syt-1 and to resolve their interaction at high resolution.

## 1 The structure and interaction affinity of the complex NbSyt1 and C2A domain of rSyt-1

2 In order to perform X-ray crystallography structural studies, the NbSyt1 was expressed  
3 and purified in its minimal size and without tags to be mixed in equal molar ratio with the tag-  
4 free rSyt-1 C2A<sub>(140-265)</sub> domain. A crystal diffracting to 1.68 Å revealed the NbSyt1: C2A<sub>(140-  
5 265)</sub> complex (PDB 8C5H; Supp. Table 1), burying a contact interface of approx. 662 Å<sup>2</sup>. Both  
6 proteins have similar folds, consisting of two antiparallel beta sheets and short alpha-helical  
7 segments. Most contacts are between side chains on both the NbSyt1 and C2A<sub>(140-265)</sub>, except  
8 for S107 on the NbSyt1 and Q154 and Q209 on C2A<sub>(140-265)</sub>, which make contacts with the  
9 backbone of the neighboring chain. As shown in Figure 2d, F40 from the NbSyt1 extends into  
10 a hydrophobic pocket on C2A<sub>(140-265)</sub> and is sandwiched between N207 and Q209. The C2A<sub>(140-  
11 265)</sub> aspartate residues 172, 178 and 230 coordinate a calcium ion, and the presence of the  
12 NbSyt1 does not seem to affect the calcium binding of the C2A domain. The residue E257 on  
13 the crystal structure on the C2A<sub>(140-265)</sub> has contact with 2 amino acids on the NbSyt1.  
14 Interestingly, E257 was missing in fragment-4 when performing the epitope mapping (Supp.  
15 Fig. 2b), which could explain the lack of signal of NbSyt1 on fragment-4, but a strong signal  
16 with fragment-6 (including E257). Next, we took the full cytosolic domain rSyt-1<sub>(97-421)</sub> and  
17 determined with the microscale thermophoresis assay that the NbSyt1 binds with an affinity of  
18 0.7±0.3 nM to rSyt-1<sub>(97-421)</sub> (Supp. Fig. 3).

19 When analyzing the structure to understand why the NbSyt1 interacts very weakly with  
20 rSyt-2, two points were observed. First, the glutamine Q209 in rSyt-1 is exchanged for  
21 threonine in rSyt-2. This key interacting residue has direct contact with the backbone of K38  
22 and F40 and a polar contact with side chain of residue S107 on the NbSyt1. Secondly, the  
23 valine V255 in rSyt-1 is exchanged for proline in rSyt-2, which is expected to alter the  
24 backbone geometry of the polypeptide chain and disrupting interactions in its proximity, e.g.  
25 the interactions between E257 (conserved in rSyt-2) and the NbSyt1 (S61 & N63).

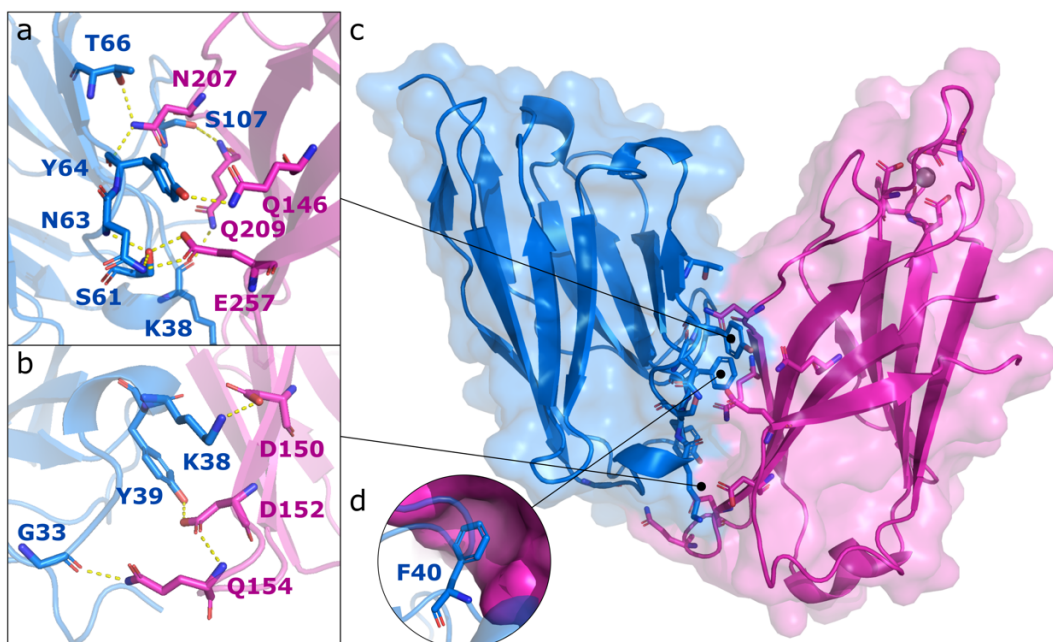

26  
27 **Figure 2. NbSyt1 (blue) in complex with its target rat Synaptotagmin 1 cytosolic C2A<sub>(140-265)</sub>**  
28 **domain (magenta), PDB ID: 8C5H. (a, b) Polar contacts between amino acids of the NbSyt1(blue)**  
29 **and C2A<sub>(140-265)</sub> domain (pink), (C) Overall structure of the complex, (d) Hydrophobic interaction**  
30 **between F40 in the NbSyt1 and a hydrophobic pocket in Syt-1 C2A<sub>(140-265)</sub> domain.**

1 **Revealing Syt-1 with minimal linkage error in various super-resolution microscopy**  
2 **techniques**

3 After determining the NbSyt1 binding affinity, binding epitope and specificity to Syt-  
4 1, we conjugated the NbSyt1 directly to fluorophores or to single-stranded DNA (ssDNA), to  
5 fulfill some of the requirements for various advanced imaging techniques like Stimulated  
6 Emission Depletion (STED), Points Accumulation for Imaging in Nanoscale Topography  
7 (PAINT) and Structural Illumination microscopy (SIM). Based on the structure, we know that  
8 the linkage error from the fluorophore on the N-terminus of the NbSyt1 is only ~1.2 nm to the  
9 closest part of the C2A, while the fluorophore located on the C-terminus is slightly below 4 nm  
10 from its target. In the case of DNA-PAINT imaging, the Atto488 fluorophore on the imager  
11 strand (i.e., the ssDNA annealing to the conjugated ssDNA on the NbSyt1) will be  
12 approximately ~4 nm away from Syt-1. This means that for the super-resolution imaging  
13 techniques tested here, the small linkage error imposed by the NbSyt1 is neglectable. Results  
14 shown on Figure 3 suggest that the commercial STED and SIM setups provided a slightly lower  
15 resolution as compared to single-molecule localization-based techniques: Exchange-PAINT  
16 <sup>20,21</sup> and Fluorescence Lifetime-PAINT (FL-PAINT) <sup>22</sup> strategies. This becomes evident when  
17 looking into the gaps in intensity profiles between the Syt-1 localization peak (at the pre-  
18 synapse) with the postsynaptic density marker PSD-95 peak, also detected with a directly  
19 labeled nanobody (Fig. 3bc). Exchange-PAINT had the tendency, in our comparison, to  
20 provide a more accurate distance between pre- (Syt-1) and post- (PSD-95) synaptic  
21 compartments (i.e., ~100-150 nm<sup>23,24</sup>).

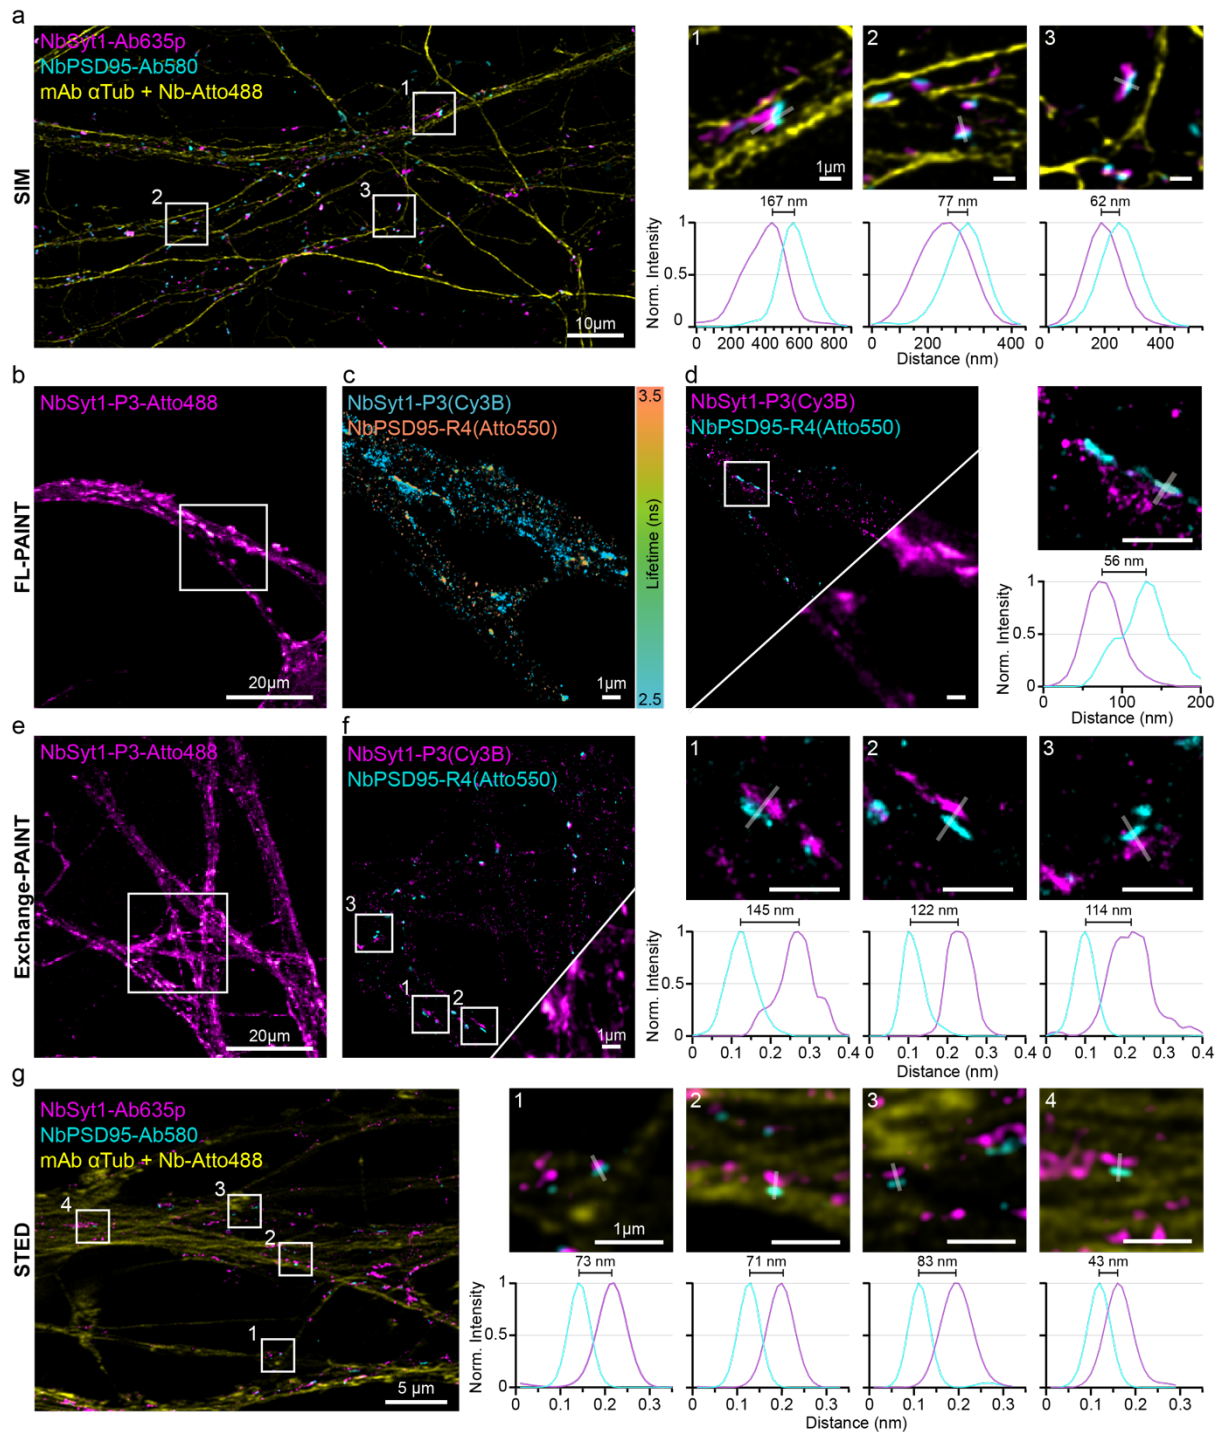

1  
2 **Figure 3. Imaging of NbSyt1 in various advanced imaging techniques.** Primary hippocampal  
3 neurons were stained and imaged. (a) Full field of view from Structured Illumination Microscopy (SIM)  
4 of NbSyt1 (magenta), NbPSD95 (cyan) and mAb anti- $\alpha$ Tub (yellow). Nbs were directly conjugated  
5 with the fluorophores and mAb anti- $\alpha$ Tub was revealed with anti-mouse IgG1 secondary nanobody  
6 (2.Nb-Atto488). White squares denote the magnified regions used for the normalized fluorescent  
7 intensity line profiles of NbSyt1 (magenta) and NbPSD95 (cyan). (b) Diffraction-limited imaging of  
8 neurons stained with NbSyt1-P3-Atto488. White square indicates the region displaying fluorescence  
9 lifetime PAINT (FL-PAINT). (c) Fluorescence lifetime imaging of NbPSD95-R4 and NbSyt1-P3-  
10 Atto488 with the P3-Cy3B and R4-Atto550 imager strands. Image is color coded based on the recorded  
11 lifetimes from 2.5 to 3.5 ns (see methods and Supp. Fig. 4). (d) Result image of NbSyt1-P3-Atto488  
12 and NbPSD95-R4 after lifetime segmentation. The white square indicates the zoomed regions with a  
13 the normalized fluorescent intensity line profiles of NbSyt1 (magenta) and NbPSD95 (cyan). (e)



1 Diffraction-limited imaging of NbSyt1-P3-Atto488. White square indicates the region selected to  
2 display **(f)** Exchange PAINT imaging of NbSyt1-P3-Atto488 (magenta) and NbPSD95-R4 (cyan) using  
3 P3-Cy3B and R4-Atto550 as imager strands. The zoomed-in regions are indicated by the white squares  
4 1, 2 and 3 with the normalized fluorescent intensity line profiles of NbSyt1 (magenta) and NbPSD95  
5 (cyan). **(g)** Stimulated Emission Depletion (STED) imaging of NbSyt1 (magenta), NbPSD95 (cyan)  
6 and mAb anti- $\alpha$ Tub (yellow). Nbs were directly conjugated with fluorophores and mAb anti- $\alpha$ Tub was  
7 revealed with 2.Nb-Atto488. White squares show the chosen regions of interest for the normalized  
8 fluorescent intensity line profiles of NbSyt1 (magenta) and NbPSD95 (cyan). All distanced denoted  
9 between the Syt-1 and PSD-95 signals are calculated from the max value after Gaussian fit of the  
10 intensity line profile.

11  
12 Next, we tested if this nanobody could be used in expansion microscopy (ExM). It has  
13 been suggested that nanobodies might not work in all ExM techniques<sup>25</sup>. Maybe due to their  
14 small size and limited numbers of fluorophores, the signal from nanobodies might not be well  
15 retained in some of the hydrogels used (Fig. 4a). Although this can happen, it strongly depends  
16 on the actual sequence of the Nb and the ExM technique. Some nanobodies could be more  
17 efficiently retained than others. With this limitation in mind, we modified the NbSyt1 by adding  
18 4 extra lysines flanking the ectopic cysteines on their N and C-termini where the fluorophores  
19 are site specific conjugated (ExM cassettes). The sequence is not digested by Proteinase K  
20 (used for some ExM techniques) and added residues with negative charges to compensate the  
21 positive charges introduced by the lysines. We aimed that these cassettes should help retaining  
22 the fluorophores to the gel following fixation for ExM. Eventually, we managed to perform  
23 10X ExM<sup>26</sup> with directly labeled NbSyt1 bearing two expansion microscopy cassettes  
24 (ExNbSyt1) and we imaged Syt-1 on expanded synapses together PSD-95 revealed by co-  
25 staining with a nanobody anti-PSD-95 (Fig. 4d).

26

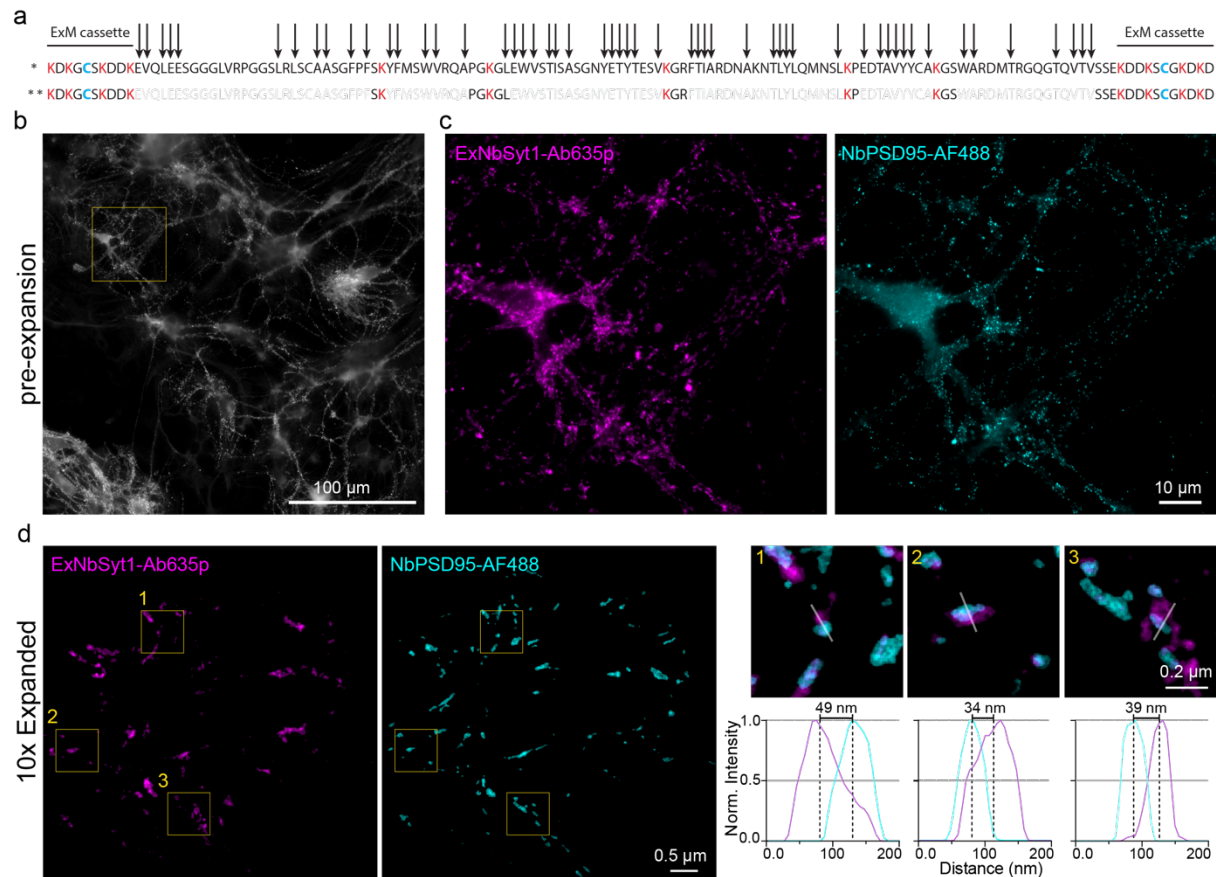

**Figure 4. Tailored NbSyt1 for post-fixation or anchoring to ExM hydrogels.** (a) We modified the NbSyt1 by adding ExM cassettes on its N and C-termini. This introduced four lysines on each end to ensure that fluorophore gets anchored on the gel. Arrows represent theoretical cleavage sites by Proteinase K, and \*\* displays the fragments that could be retained on a gel after complete proteinase digestion. (b) Epifluorescence large field of view of cultured neurons-stained pre-expansions with ExNbSyt1-Ab635p. (c) Magnified region on b displaying ExNbSyt1-Ab635p (magenta) and FluoTag-X2 anti-PSD95 AlexaFluor488 (cyan). (d) The same sample as in b is now expanded and imaged in a laser-scanning confocal microscope. Squares show chosen regions of interest and the corresponding normalized fluorescent intensity line profiles of ExNbSyt1 (magenta) and NbPSD95 (cyan).

### Using NbSyt1 as intrabody (iNbSyt1) in living neurons

The single-chain nature of nanobodies, allows their expression inside eukaryotic cells. Nanobody-based intrabodies<sup>27</sup> have been used to follow target protein in living cells and create molecular sensors for in vivo applications<sup>28</sup>. To test if the NbSyt1 folds properly in the reducing cytoplasm of living neurons and retains its high epitope specificity towards Syt-1, we subcloned the NbSyt1 into an adeno associated virus (AAV) vector in frame with its C-terminus to mScarlet<sup>29</sup> or mNeonGreen<sup>30</sup> fluorescent proteins. Primary hippocampal neurons tolerated the infection and expression of this chimera for more than 4 days without showing any obvious signal of toxicity (Supp. Movie1 & Supp. Movie2 for mScarlet and mNeonGreen respectively). Moreover, when imaged live, we were able to follow packages or synaptic vesicles moving along neuronal processes, providing a high contrast and good signal to noise ratio (Fig. 5 & Supp. Movie 1). This provided us the initial indications that the NbSyt1 is functional as an intrabody (iNbSyt1) in primary hippocampal cultures.

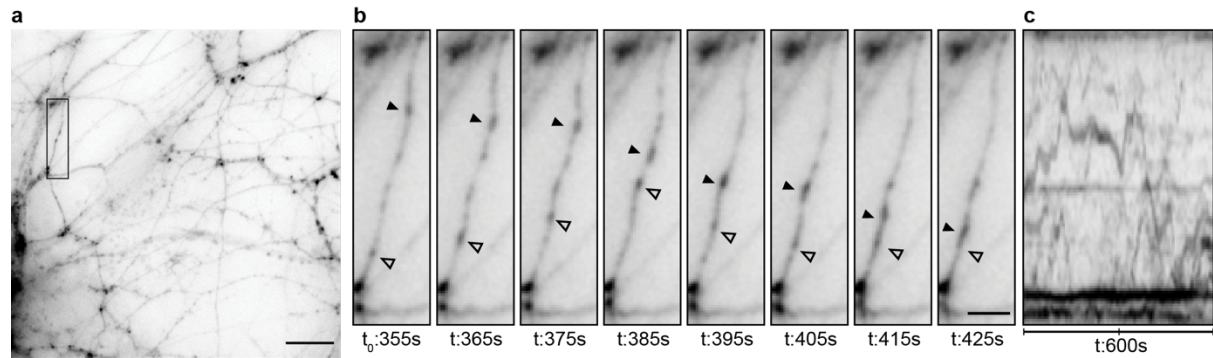

**Figure 5. Live imaging of iNbSyt1-mScarlet.** (a) Full field of view of a timelapse imaging (Supp. Movie 1). Area inside the black rectangle is magnified in b. Scale bar represents 10  $\mu$ m. (b) Crop region of time lapse imaging at different timepoints (t). Arrow heads denote iNbSyt1mScarlet signal moving along a neuronal process. Scale bar represents 5  $\mu$ m. (c) Ten minutes kymograph of the neuronal process.

### Assessment of synaptic activity in presence of the iNbSyt1

To test whether our engineered NbSyt1 intrabody with its high specificity to the C2A domain of Syt-1 is not altering synaptic physiology, we investigated neuronal activity in primary neuronal culture. We first checked changes in synaptic vesicle release properties using the fusion of VAMP2 with the superecliptic GFP, also known as SynaptopHluorin (SpH)<sup>31</sup>. This approach allowed us to evaluate if the iNbSyt1 has any effect on synaptic vesicle release and SV endocytosis. First, we confirmed that the iNbSyt1 is clearly localized at presynaptic terminals where it strongly colocalized with immunostainings for Synaptophysin and Bassoon (Fig. 6a). Then, we generated a bicistronic AAV expressing the iNbSyt1 and SpH<sup>31</sup>. When following the SpH signal after 60 action potentials (AP) or 600 AP at 20 Hz stimulation rate, we were not able to observe differences in SpH signal traces between neurons with or without expression of the iNbSyt1 (Fig. 6b). These results directly suggest that the expected enrichment of iNbSyt1 at pre-synapses, does not affect synaptic vesicle fusion mechanisms under evoked release, nor the endocytosis and subsequent reacidification of vesicles.

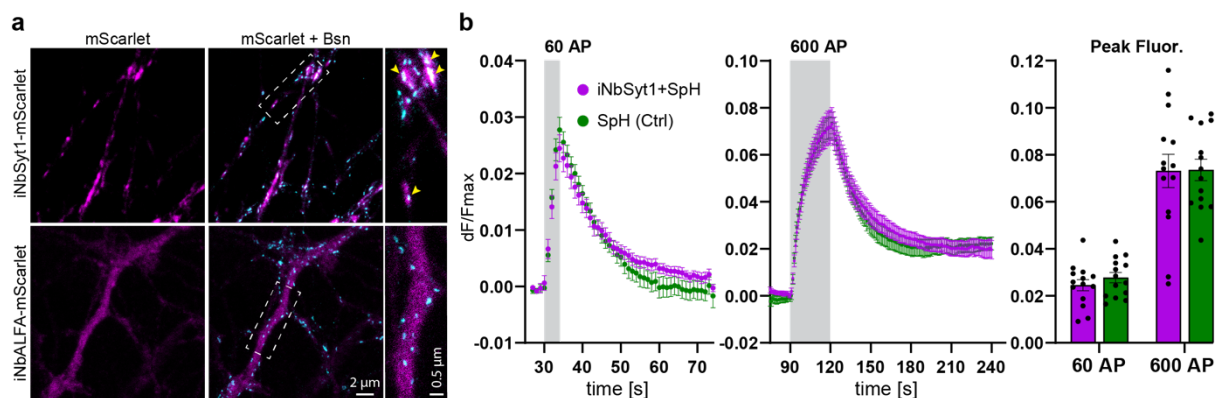

**Figure 6. Intrabody iNbSyt1 localization and its potential effects on exocytosis physiology monitored using SynaptopHluorin.** (a) The NbSyt1 as intrabody fused to mScarlet (iNbSyt1-mScarlet) displayed in magenta gets enriched in synapses confirmed by its co-localization signal (arrow heads on zoomed region) of immunostained Bassoon (Bsn) imaged under STED microscopy showed in cyan. Expression of the NbALFA fused to mScarlet as intrabody (iNbALFA-mScarlet) provides a diffused signal distribution throughout neuronal processes. Scale bar represents 2  $\mu$ m and 0.5  $\mu$ m in zoomed region. (b) Neurons AAV infected with a bicistronic expression of iNbSyt1 and SynaptopHluorin (SpH) enabled to monitor the iNbSyt1 potential effect on synaptic vesicle fusion competency and dynamics. The expression of only SpH as control, resulted in no significant difference in peak fluorescence nor in rise or decay time of pHluorin signal after electric field stimulation with 60

1 action potentials (AP) or 600 AP at 20 Hz. Plots in (b) display the average and the SEM from 14  
 2 independent experiments (n=14), approximately 200 ROIs automatically were selected and analyzed  
 3 per experiment with a total of 3323 ROIs for iNbSyt1 and 2860 for NbALFA.

4  
 5 Next, we looked for changes in the spontaneous release rate that could potentially arise  
 6 from expression of our Syt-1 intrabodies. We therefore recorded non-evoked excitatory and  
 7 inhibitory postsynaptic currents in the presence of tetrodotoxins in primary neuronal culture  
 8 (miniature EPSCs and IPSCs) (Fig. 7a) for both, the iNbSyt1 and the original candidate  
 9 iNbA91. We observed no significant differences in the amplitudes (quantal release of  
 10 neurotransmitters) nor in  $\tau_{on}$  and  $\tau_{off}$  kinetics between cultures infected with iNbSyt1  
 11 and iNbALFA<sup>32</sup> (used as a control intrabody since it has no target molecules in neurons). For  
 12 the mEPSC rate, we observed a trend for both iNbSyt1 (iNbA51) and iNbA91 with a slight  
 13 increase in rate of miniature postsynaptic currents, however not statistically significant for  
 14 iNbSyt1 (Fig. 7d).

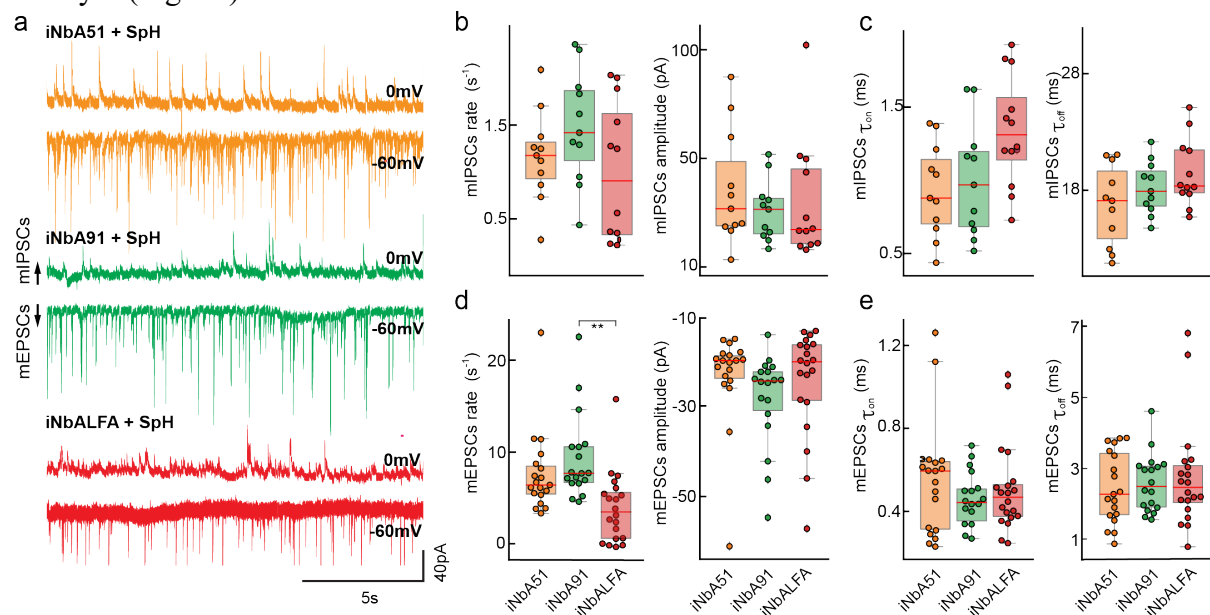

15  
 16 **Figure 7. Electrophysiological analysis of mini EPSCs and IPSCs on primary hippocampal**  
 17 **neurons.** (a) Exemplary traces of mEPSCs and mIPSCs of neurons in a whole-cell configuration  
 18 clamped at -60 and 0 mV, respectively. Cultures were infected using AAVs containing sequences of  
 19 the respective intrabody and SpH. Upper traces represent mIPSCs and lower traces mEPSPs. (b-d)  
 20 Boxplots summarizing mIPSCs and mEPSCs properties such as rate and amplitude (b and d) and  $\tau_{on}$   
 21 and  $\tau_{off}$  (c and e). For statistics, mIPSCs, n = 10-12 cells per group; mEPSCs, n = 18-21 cells per  
 22 group, a one-way ANOVA with multiple comparison was applied with Tukey correction. P-values:  
 23 \*\* =  $p < 0.01$ .

24  
 25 In light of our structural data that shows binding of NbSyt1 to the C2A domain of Syt-  
 26 1, these findings are in line with the observations made by Courtney et al.<sup>8</sup>. They also observed  
 27 that after genetically removing the C2A domain from Syt-1, a minimal effect on evoked release  
 28 and a slight increase in the spontaneous miniature release could be observed. On the contrary,  
 29 they also show that if the C2B domain is truncated, the action potential triggered synaptic  
 30 vesicle fusion to the plasma membrane is drastically impaired<sup>8</sup>. Therefore, our data suggest  
 31 that the iNbSyt1 bound to the C2A has no detrimental physiological effect in evoked activity  
 32 on the synaptic physiology, and potentially neglectable effects in facilitating spontaneous  
 33 release.

## 1 Targeted calcium detection on pre-synapses

2 After characterizing the nanobody, its interactions and its effects on synaptic  
3 physiology, we thought to use it as an ideal tool to increase the synaptic targeting of genetically  
4 encoded calcium indicator, to be able to measure the  $\text{Ca}^{2+}$  changes in close proximity of the  
5 SV sensor for  $\text{Ca}^{2+}$  (i.e., Syt-1). This approach would allow us to reveal active synapses in  
6 living neurons, and perform calcium imaging on pre-synapses with high precision and with  
7 minimal impact on neuronal physiology, as we are not overexpressing chimeric synaptic  
8 vesicle proteins for the targeting. For this we generated new AAVs expressing the NbSyt1 as  
9 an intrabody and fused to the calcium sensor jGCaMP8s and jGCaMP8m (iNbSyt1-  
10 jGCaMP8)<sup>19</sup>. As control, we used the iNbALFA fused to the calcium sensors. As the NbALFA  
11 has been shown to work as intrabody<sup>32</sup>, but has no specific binding partners in rat hippocampal  
12 neurons, this would be the most appropriate control for these experiments. As expected from  
13 previous results, we observed the enrichment of synaptically-targeted calcium sensors enriched  
14 at synaptic boutons (Supp. Movie 3), and mostly a diffused signal with the control (Fig. 8a).  
15 Both sensors showed good signal following evoked 1 and 3 APs (Fig. 8b). However, when  
16 observing the traces from single boutons, the synaptically localized sensor provided more  
17 reliable signals, as single action potentials were sometimes lost in the background when  
18 measuring with the control sensor (Fig. 8b). To further corroborate this observation, we  
19 performed a more formal analysis on several boutons, also considering if the synaptically  
20 targeted sensor provides additional spatial information for the calcium signal compared to the  
21 control. For this we identified the boutons at the end of each movie following a 300 AP  
22 stimulus, and used this signal to select the center of the boutons synaptic proximal and distal  
23 areas (Fig. 8c). Using this analysis, we were able to see that the pre-synaptically localized  
24 sensors provided more precise spatial resolution and better signal to noise ratio (SNR) when  
25 compared to the control (Respectively Fig. 8d, e and Fig. 8f, g). Finally, having this highly  
26 sensitive and localized calcium sensor, allowed us to follow spontaneous network activity and  
27 observe bursts on primary hippocampal neurons using the slow and medium speed sensors  
28 (Fig. 8h, i).  
29

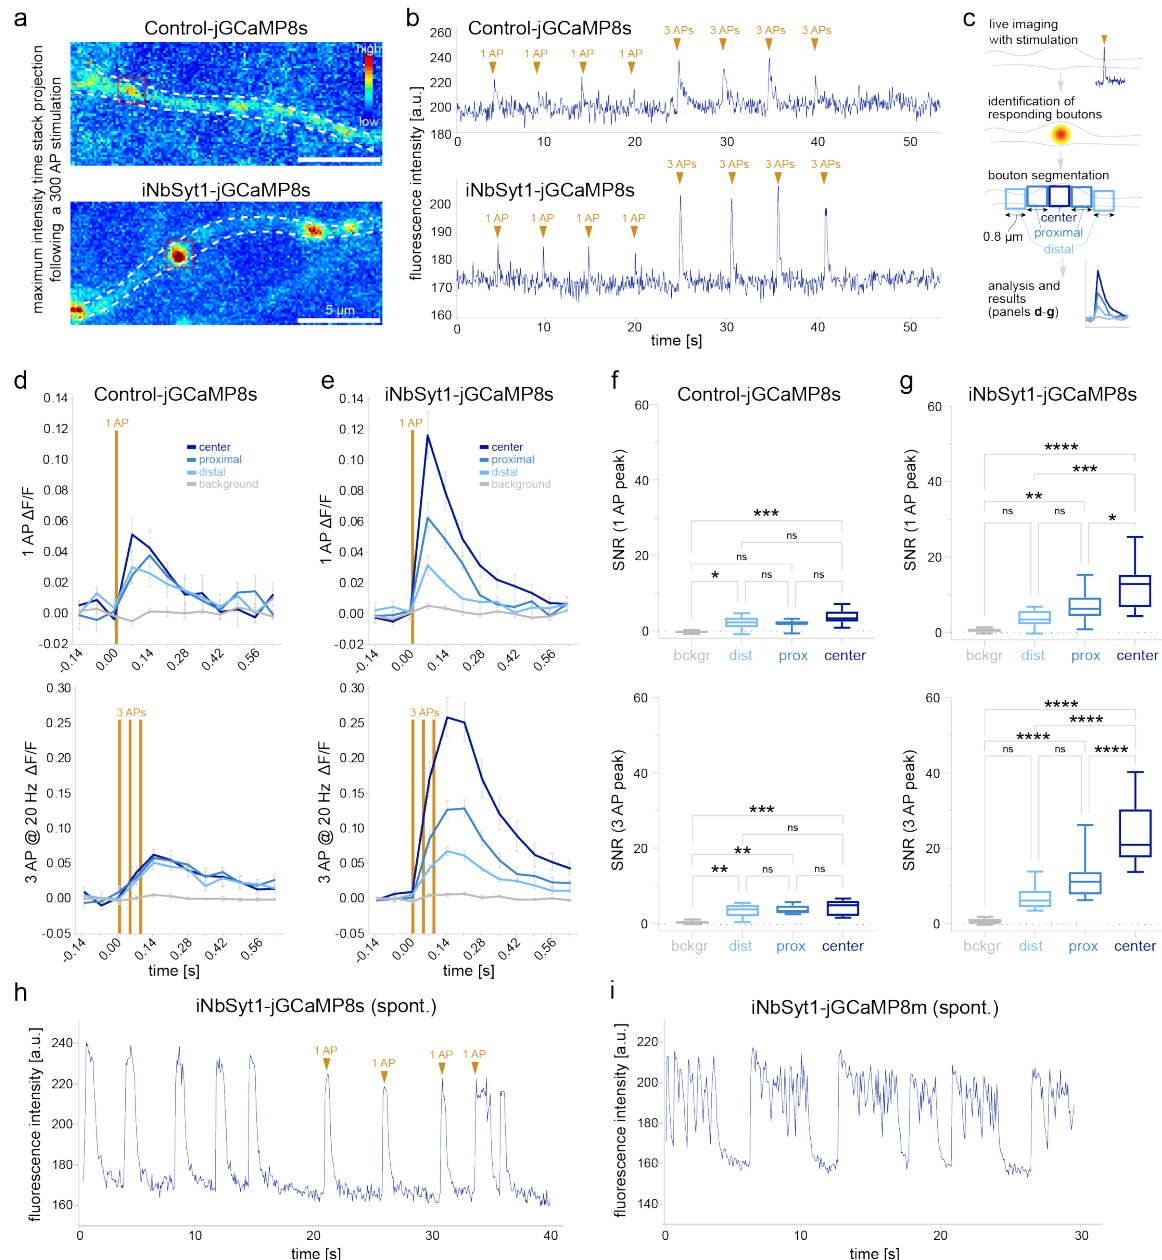

1  
2 **Figure 8. A synaptically localized calcium sensor to precisely detect calcium changes with**  
3 **improved intensity and spatial resolution.** (a) Expression of the iNbSyt1 fused to jGCaMP8s shows  
4 clear presynaptic localization when compared to the control (iNbALFA). Scale bar 5  $\mu$ m. (b) Exemplary  
5 traces from single boutons following trains of 1AP or 3AP applied at defined time intervals. Note that  
6 in some cases, due to low signal-to-noise ratio (SNR), it is difficult to observe 1AP responses with the  
7 control sensor. (c) Scheme summarizing the analysis performed in panels d-g. Briefly, at the end of  
8 each experiment, a strong 300 AP stimulation was applied to identify responding boutons. For the  
9 analysis, the central area of each bouton was considered (center) together with the proximal or the distal  
10 synaptic regions, defined as small ROIs of 0.8  $\mu$ m adjacent to the center as schematized. (d-e) Signal  
11 expressed as  $\Delta F/F$  for the different synaptic regions for either the control or for the iNbSyt1-jGCaMP8s  
12 following either 1AP or 3APs. Note that the response at the center of the bouton is higher than in the  
13 periphery for the iNbSyt1-jGCaMP8s (panel e). N = 80 corresponding to measures obtained for 20  
14 boutons for each condition for each stimulation pattern (coming from 3 independent coverslips). (f-g)  
15 SNR analyses of the data from panels d and e. The average noise was calculated for each trace at rest  
16 and the SNR was measured for a background region and for the regions as schematized in panel c. The  
17 data are expressed as box plots where the whiskers represent the 5-95 percentiles. For statistical  
18 significance, one way ANOVA followed by Tukey's multiple comparison tests was used. *P*-values:

1 \* =  $p < 0.05$ ; \*\* =  $p < 0.01$ ; \*\*\* =  $p < 0.001$  and \*\*\*\* =  $p < 0.0001$ . (h-i) exemplary traces of  
2 spontaneous activity (without CNQX & D-AP5) measured respectively for the iNbSyt1-jGCaMP8s (h)  
3 or iNbSyt1-jGCaMP8m (i). In panel (h) also exogenous stimulation (1AP) is able to trigger network  
4 responses. Note that, during bursts, the faster jGCaMP8m version might be appropriate for revealing  
5 faster changes in the calcium signal as previously published<sup>19</sup>.

## 6 **Discussion**

7 Here we developed and characterized an extremely flexible affinity tool, the NbSyt1,  
8 that allows the study of Syt-1 from several angles. We prove the usefulness of this Nb in  
9 conventional microscopy, various super-resolution imaging modalities, and as an intrabody in  
10 living neurons to follow the molecular physiology of synapses without overexpressing a tagged  
11 synaptic protein.

12 We selected a camelid single-domain antibody binding with excellent specificity and  
13 affinity to the C2A calcium-binding domain of Syt-1. The structural data we obtained from the  
14 Syt-1-NbSyt1 complex confirms the very high binding affinity (~0.7 nM) and specificity,  
15 which is a consequence of polar and hydrophobic interactions, explaining its selectivity for  
16 Syt-1. NbSyt1 does not recognize the C2A domain of Syt-2, which shares a very high degree  
17 of identity with Syt-1 (77,7% identity on the full protein, and 86,6% on the C2A domain).  
18 Importantly, the crystal structure also shows that the binding occurs on the opposite side from  
19 the calcium-binding pocket of the C2A domain, which encouraged us to use this nanobody in  
20 living neurons as an intrabody, as this region is likely to be not involved in lipid or other protein  
21 interactions<sup>10,14</sup>.

22 The advantages of nanobodies as affinity probes for imaging over classical antibodies  
23 have been thoroughly described<sup>24,33,34</sup>. Some of the main benefits are their monovalency  
24 (stoichiometric labeling) and their small size allowing to place the fluorophore ~2–4 nm from  
25 the target. These features make NbSyt1 ideal for quantitative imaging<sup>35–37</sup> and high-precision  
26 nanoscopy, respectively, where conventional antibodies would place the fluorophores with a  
27 linkage error comparable to or sometimes larger than the resolution that different techniques  
28 attain<sup>24,38</sup>.

29 Additionally, the NbSyt1 is functional when expressed in neurons as an intrabody  
30 (iNbSyt1). This can be clearly observed *in vivo* as the iNbSyt1 is able to get enriched on  
31 presynaptic boutons with practically no effect on SV release physiology (Fig. 6). This feature  
32 results in the possibility of specifically labelling synapses relying on the endogenous  
33 expression levels of Syt-1 without changing the stoichiometry of synaptic proteins by over-  
34 expression or modifying their function or location by fusing them with tags like fluorescent  
35 proteins. Therefore, we demonstrated using SpH (Fig. 6) and electrophysiology (Fig.7)  
36 strategies that synaptic vesicle machinery appears not to be affected by the presence of  
37 iNbSyt1. A not significant tendency of an increased miniature rate when expressed iNbSyt1  
38 could be related to the observations made previously by Courtney et al.<sup>8</sup>.

39 Finally, we exploited one of its unique features of bringing a sensor directly to the  
40 presynaptic compartment, and we fused the iNbSyt1 to a genetically encoded calcium sensor  
41 (jCaMP8), demonstrating that it enriches at synapses. This has a simple practical implication  
42 as it makes it very convenient for deciding presynaptic regions to image where Syt-1 is  
43 enriched. Moreover, having a calcium sensor directly positioned where the calcium should  
44 matter the most for SV-release regulation, in close proximity to its sensor, results in the precise  
45

1 and locally-enhanced detection of a single AP with an increased signal-to-noise ratio.  
2 Similarly, we used this tool for recording the spontaneous activity of hippocampal neuronal  
3 cultures using two chimeras with different speeds in detecting Ca<sup>2+</sup> variations (respectively the  
4 slower iNbSyt1-jCaMP8s and the faster iNbSyt1-jCaMP8m). These two tools will serve the  
5 community depending on different experimental needs both for the study of presynaptic  
6 calcium and for the role of Syt-1 in different cellular models.

7 Overall, here we established, engineered and thoroughly characterized a nanobody  
8 binding to the C2A domain of Syt-1. This versatile tool shows outstanding features for  
9 quantitative and super-resolution microscopy, but it also provides exceptional properties to be  
10 used in living neurons and follow or manipulate presynaptic molecular physiology. We expect  
11 this bio-tool to be instrumental in understanding Syt-1's role in SV fusion and neuronal  
12 physiology.

13



## 1 **Material and Methods**

2

3 **Synaptosomes preparations.** Rat synaptosomes were enriched as previously described<sup>39</sup>  
4 Briefly, rat brains were homogenized using a glass-Teflon homogenizer in precooled sucrose  
5 buffer (320 mM Sucrose, 5mM HEPES, pH 7.4). Centrifugation at 1000 x g for 2 minutes was  
6 performed, and the supernatant was further centrifuged at 15,000 x g for 12 minutes. Next, a  
7 discontinuous Ficoll density gradient was applied. The fractions at the interface of the 9%  
8 Ficoll were pooled and washed in sucrose buffer.

9

10 **Immunizations.** Two alpacas were immunized with this preparation. The procedure was  
11 performed by Preclinics GmbH (Postdam, Germany). Six injections were performed weakly  
12 with 500 µg rat synaptosomes (total protein determined by BCA assay). Two weeks after the  
13 last immunization a single boost with 500 µg of synaptosomes was performed and 100 ml of  
14 blood was taken 3 and 5 days after the boost immunization. PBMCs were isolated using Ficoll  
15 gradient and Serum was stored at -80°C. Total RNA was extracted using RNA extraction  
16 Qiagen kit (Qiagen).

17

18 **Enrichment of IgG2 & IgG3 from plasma.** Plasma from the 2 fully immunized animal was  
19 enriched in IgG2 and IgG3 following the protocol described by Hamers-Casterman with  
20 minimal modifications<sup>40</sup>. The affinity selection steps were done using an Äkta-Prime FPLC  
21 system (Cytiva). Between 5 and 10 mL of plasma was diluted in PBS in a one-to-one ratio and  
22 filtered through a 0.45 µm pore size syringe filters (Stedim Minisart®, Sartorius). The plasma  
23 was then injected in HiTrap protein G HP (Cytiva), the flowthrough was collected and injected  
24 in HiTrap protein A (Cytiva). The bound IgGs were eluted from the HiTrap protein G column  
25 with first 0.15 M NaCl, 0.58% Acetic acid, pH 3.5 to collect mainly IgG3 and a second elution  
26 using 0.1 M glycine-HCl, pH 2.7 to collect mainly IgG1. The IgG bound to the HiTrap protein  
27 A column were eluted with 0.15 M NaCl, 0.58% Acetic, pH 4.0 to collect the IgG2. To  
28 neutralize the pH of the collected fractions, 1 M Tris-HCl pH 9.0 was added and the buffer was  
29 exchanged to PBS by injection in HiTrap Desalting Columns (Cytiva). A sample of the  
30 collected and desalted fractions were analyzed by denaturing PAGE. IgG2 and IgG3 fractions  
31 were pooled together, and residual IgG1 were further removed by incubating the pooled sample  
32 with agarose beads conjugated with anti-llama light chain (Capralogics).

33

34 **Plasma-ELISA.** Purified antigen was immobilized on a 96 well immunosorbent plate (Nunc).  
35 All the following steps were done by gentle shaking on an orbital shaker. 30 nmol of purified  
36 Syt-1<sub>(197-421)</sub> was diluted in 200 µL of 100 mM Tris, 150 mM NaCl (pH 8.0) were coated  
37 overnight at 4°C. The plate was then washed with PBS and blocked with 5% (w/v) skim Milk  
38 in PBS for 3 h at RT. The enriched IgG2-IgG3 were added to the wells in a concentration of  
39 0.5 mg/mL and incubated for 2h at RT. A series of three washes with PBS was performed. The  
40 presence of bound IgG2 and IgG3 was revealed with the mouse anti-Camelid antibody coupled  
41 to HRP (Preclinics, clone: P17Ig12) diluted 1:2000 in PBS. The antibody was incubated for 2  
42 h at RT, then washed 3 times with PBS. The ELISA was revealed by addition of 100 µL of  
43 TMB substrate (ThermoFischer) until the blue color was stable. The reaction was quenched by

1 addition of 100  $\mu$ L of 2 M sulfuric acid. The absorbance was then read at 430 nm using a plate  
2 reader (BioTek).

3

4 **Nanobody library generation.** Total mRNA was extracted from the PBMC obtained from 2  
5 alpacas using standard RNA extraction kit (Qiagen). Recovered mRNA was retrotranscribed  
6 to cDNA by using Superscript IV (ThermoFischer) and the Cal 0001/2 primers as described  
7 before<sup>41</sup>. Next, a second PCR was performed to introduce the Gibson cloning overhangs for  
8 further insertion in the phagemid. The final PCR product was diluted to 5 ng/ $\mu$ L and some  
9 loaded on a 1.5 % Agarose gel to confirming the right size of the PCR product. Fragments were  
10 cloned into the phagemid using Gibson assembly. The phagemid backbone used was obtained  
11 from the pHen2 plasmid. After Gibson cloning, the obtained construct was purified by PCR  
12 purification kit (Qiagen) and the concentration was measured by Nanodrop. The constructs  
13 were then electroporated in TG1 bacteria (Biocat). For the transformation, 65 ng of DNA were  
14 added to 50  $\mu$ L of TG1. This process was repeated 20 times. The reactions were left 1 hour at  
15 37°C for initial growth and then pooled in 400 mL of 2YT medium (ThermoFischer)  
16 supplemented with antibiotics and grown overnight at 37°C. Next day, bacteria were pelleted  
17 and resuspended in 25 mL LB medium (ThermoFischer) and 25 % Glycerol. The  
18 Synaptosome-library was aliquoted, snap frozen and stored at -80 °C.

19

20 **Phage-Display.** The procedure was performed as described in Maidorn et al.<sup>42</sup> with some  
21 modifications. To start the process, a 1 mL the synaptosome nanobody library was diluted in  
22 500 mL of 2YT supplemented with antibiotic and grow at 37°C until OD600 reached ~0.5.  
23 Next,  $\sim 0.1 \times 10^{13}$  M13KO7 Helper Phages (NEB) were added to the culture and let the infection  
24 for 45 minutes at 37°C. Bacteria were then pelleted and resuspended in 500 mL 2YT medium  
25 supplemented with the necessary antibiotics. Infected bacteria were incubated overnight at  
26 30°C to produce the phages. The next day culture supernatant was incubated with 4 % (w/v)  
27 PEG-8000 and let on ice for <2 hours to allow phages to precipitate. After several washings  
28 steps in PBS, phages were filtered with a 0.45  $\mu$ m syringe filter (Sartorius). Purified Syt-1<sub>(97-</sub>  
29 421) was conjugated to desthiobiotin-N-Hydrosuccimide Ester (Beryy and Associates). Excess  
30 of dt-Biotin-NHS was removed using Nap10 column (Cytiva). Between 1 and 3 nmol of  
31 antigen was bound pre-equilibrated Dynabeads MyOne Streptavidin C1 (ThermoFischer) for  
32 1 hour at RT. After binding of Syt-1<sub>(197-421)</sub> to the beads, the beads were washed 5 times with  
33 PBS supplemented with 0.01 % (v/v) Tween (PBS-T). The purified phages were mixed with  
34 the beads loaded with Syt-1<sub>(197-421)</sub> and incubated for 2 hours at RT. Bead were thoroughly  
35 washed in PBS-T. The elution of Syt-1<sub>(197-421)</sub> and bound phages was carried out using 50 mM  
36 Biotin in PBS. Eluted phages were then used to reinfect TG1 cells and initiate another cycle of  
37 panning (a total of 3 panning rounds were performed). After the last panning round, bacteria  
38 were plated in LB agar supplemented with antibiotics. The next day 96 colonies were picked  
39 and grew in 96-deep-well plates. A copy of the plate was stored at -80°C after adding 50%  
40 glycerol.

41

42 **Phage-ELISA.** Each clone in the 96-deep-well plate was infected with helper phages and let  
43 overnight producing phages. Bacteria are centrifuged down and supernatants full with phages  
44 can be use directly. The desthio-biotinylated Syt-1<sub>(97-421)</sub> was immobilized at 4°C overnight on

1 a flat-bottom Nunc MaxiSorp™ 96-well plate (ThermoFischer). The plate was washed 3 times  
2 with PBS-T and blocked using 5% skim Milk and 1% BSA in PBS-T for 2h at RT. Next, 25 µl  
3 of phages produced by the picked colonies were incubated on the well with 75 µL 5% skim  
4 milk in PBS-T for 1 hour at RT. The unbound phages were washed six times with PBS-T, and  
5 bound phages were detected with anti-major coat protein M13-HRP (Santa Cruz, #sc-53004-  
6 HRP) diluted 1:1000 in 100 µL PBS-T. The antibody was let for 1 hour at RT and excess was  
7 thoroughly washed away with PBS-T. TMB substrate (3,3',5,5'-tetramethylbenzidine, 1-  
8 Step™ Ultra TBM-ELISA, Thermo Scientific) was added to each well and the colorimetric  
9 reaction was stopped by addition of 100 µL of 2M sulfuric acid. The absorbance was read at  
10 450 nm throughout the plate (Cytation™ 3: BioTek™ Instruments, Inc.).

11  
12 **Protein expression and purification.** Syt-1 fragments were produced in NEB-Express (NEB),  
13 while nanobodies were produced in SHuffle® Express (NEB). Bacteria were grown on terrific  
14 broth supplemented with kanamycin at 37°C for Syt-1 and 30°C for nanobodies. When OD600  
15 reached ~2-3, 0.4 mM IPTG was added and temperature was set to 30°C. Induction was  
16 allowed for ~16h (overnight). Fully grown cultures were centrifuged and pellet resuspended in  
17 cold lysate buffer (LysB: 100 mM HEPES, 500 mM NaCl, 25 mM imidazole, 2.5 mM MgCl<sub>2</sub>,  
18 10% v/v glycerol, 1 mM DTT, pH 8.0) supplemented with DNase (1:250), lysozyme (1:250)  
19 and 1 mM PMSF. After 30 minutes incubation and disruption by sonication, lysate was  
20 centrifuged at ~11,000g for 1h at 4°C. Supernatant was incubated with LysB equilibrate Ni<sup>+</sup>  
21 beads (Roche cOmplete Resin) for 1h at RT. Beads were washed with 3 column volumes using  
22 LysB buffer, 5 CV with high salt buffer (HSB; 50 mM HEPES, 1.5 M NaCl, 25 mM imidazole,  
23 2.5 mM MgCl<sub>2</sub>, 5% v/v glycerol, 1 mM DTT, pH 7.5). Finally, before the elution, beads were  
24 washed in the buffer of choice for the next application. Elution was carried out using self-  
25 produced SUMO protease cleaving on column the HisTag-SUMO domain, releasing the  
26 protein of interest. Fractions were collected until absorbance a 280 nm drops to baseline. Eluted  
27 proteins were initially evaluated on a PAGE.

28  
29 **Fluorophore conjugation to nanobodies.** Purified nanobodies bearing one or two ectopic  
30 cysteines (at their C-terminus or N- and C-termini) were reduced for 1 h using 10 mM of tris(2-  
31 carboxyethyl)phosphine (TCEP), pH 7. The excess of TCEP was removed using a gravity  
32 NAP5 column (Cytiva) previously equilibrated with degasses PBS pH 7.4. Freshly reduced  
33 nanobodies were immediately mixed with ~3-5 molar excess of maleimide functionalized  
34 fluorophore and incubated for 1h. The excess of dye was removed by using Superdex™ 75  
35 increase 10/300 GL column (Cytiva) on Äkta FPLC system.

36  
37 **Oligonucleotide conjugation to nanobodies.** NbSyt1 was produced having one ectopic  
38 cysteine on its C-terminus, while secondary anti-mouse IgG1 nanobody and anti PSD-95  
39 nanobody carrying an ectopic cysteine were obtained from NanoTag Biotechnologies GmbH  
40 (#N2005 and #N3705). Nanobodies used for DNA-PAINT imaging were coupled with  
41 different docking single-DNA-strands (Biomers GmbH, Ulm, Germany) as described  
42 earlier<sup>21,22</sup>. In brief, nanobodies were reduced with 5 mM TCEP, pH: 7, (Sigma-Aldrich,  
43 #C4706) for 2 h. After removal of TCEP via 10 kDa molecular weight cut-off (MWCO)  
44 Amicon spin filters (Merck, #UFC500324), the reduced nanobodies were coupled using 10-

1 fold excess of maleimide-DBCO crosslinker (Sigma-Aldrich, #760668). The excess of  
2 crosslinker was removed using 10 kDa MWCO Amicon spin filters. Azide functionalized  
3 DNA-strands (Biomers) were mixed in excess with nanobody-DBCO to promote the azide-  
4 alkyne cycloaddition (click) reaction. The excess Azide docking DNA-strands were removed  
5 by size exclusion chromatography using an Äkta pure 25 system (Cytiva) equipped with the  
6 Superdex® Increase 75 column (Cytiva). The sequences of the docking strands P3 (3'-  
7 TTTCTTCATTATTTT-5') and R4 (3'-ACACACACACACACACACA-5')<sup>43,44</sup>

8

## 9 **Dot blot assays**

10 Target proteins and negative control (BSA) were spotted (~1 µg and ~5 µg respectively) on a  
11 nitrocellulose membrane and let them dry at RT. Membranes were incubated with blocking  
12 buffer (PBS supplemented with 0.05% (v/v) of Tween20 and 5% milk) under gentle shaking  
13 for 2h. After blocking step, blocking buffer was removed and membranes were incubated with  
14 NbA51 or NbA91 directly labeled with AbberiorStar635p in 5% milk PBS-Tween20 at a final  
15 concentration of 5 nM for 1h. For specificity assay in Supp. Fig 2, one membrane was  
16 incubated with 1:100 dilution of polyclonal affinity purified anti-Synaptotagmin 1/2 cytosolic  
17 domain (SySy, #105 003) premixed with 3 molar excess of FluoTag®-X2 anti-Rabbit IgG  
18 conjugated to AbberiorStar635p (NanoTag Biotechnologies, #N2402-Ab635P). Membranes  
19 were thoroughly washed with PBS-T and fluorescence signal was detected in Amersham™  
20 Imager 600.

21

22 **Cell culture.** COS-7 cells were cultured in Dulbecco's MEM supplemented with 10% FBS, 4  
23 mM L-glutamine, 0.6% penicillin and streptomycin, cells were cultured at 37°C, 5% CO<sub>2</sub> in a  
24 humidified incubator. COS-7 fibroblasts were obtained from the Leibniz Institute DSMZ—  
25 German Collection of Microorganisms and Cell Culture (DSMZ Braunschweig, Germany). For  
26 immunostainings, cells were plated on poly-L-lysine (PLL)-coated coverslips.

27 Rat primary hippocampal neuron cultures for imaging were prepared as described before<sup>28</sup>. In  
28 brief, the brains of P1-2 rat pups were extracted and placed in cold HBSS (ThermoFisher). The  
29 hippocampi were extracted and placed in a solution containing 10 mL DMEM (ThermoFisher),  
30 1.6 mM cysteine, 1 mM CaCl<sub>2</sub>, 0.5 mM EDTA, 25 units of papain per mL of solution, with  
31 CO<sub>2</sub> bubbling, at 37°C for 1h. The solution was removed and the hippocampi were incubated  
32 in 10% FBS-DMEM, 73 µM albumin for 15 minutes. The hippocampi were triturated using a  
33 10 mL pipette in complete-neurobasal medium (Neurobasal A (ThermoFisher), containing 2%  
34 B27 (ThermoFisher) and 1% Glutamax-I (ThermoFisher)). Neurons were plated (12-well  
35 plate) on glass coverslips coated with poly-L-lysine-hydrochloride (1 mg/ml, Merck). After 2h,  
36 the plating medium was replaced with 1.25 ml complete-neurobasal medium and neurons were  
37 incubated for 15 days at 37°C, 5% CO<sub>2</sub> in a humidified incubator. Cultures for  
38 electrophysiology recordings were prepared according to Goslin and Banker<sup>45</sup> using embryonic  
39 day 18 old rat embryos. Cells were plated in a density of 40.000 cells per 18 mm coverslip,  
40 grown in 1 ml of neurobasal medium (NB, Gibco) supplemented with B27 medium. Ara-C  
41 (cytosine β-D-arabinofuranoside) at a final concentration of 5 µM was included in the culture  
42 medium at DIV 7 to suppress glia proliferation.

43

1 **Affinity determination.** The affinity of the NbSyt1 was measured by microscale  
2 thermophoresis using the device NT.115Pico Monolith (NanoTemper). NbSyt1 was labelled  
3 with Alexa647 (as described above) and diluted in MST buffer (NanoTemper) supplemented  
4 with 0.05 % Tween. Fluorescent NbSyt1 was incubated with different dilutions of purified Syt-  
5 1<sub>(97-421)</sub> using Premium Coated Capillaries (NanoTemper). For operation of the instrument and  
6 evaluation of affinity data, the MO.Control and MO.Affinity Analysis software (NanoTemper)  
7 were used.

8  
9 **Immunofluorescence.** For Fig. 1b COS-7 Cells were fixed for 20 minutes using 4%  
10 paraformaldehyde (PFA) in PBS at RT. After rinsing short with PBS, remaining aldehyde  
11 groups were quenched for 15 minutes using 0.1 M glycine in PBS at RT. Cells were blocked  
12 and permeabilized with 3% (w/v) BSA + 0.1% (v/v) Triton X-100 for 40 minutes at RT and  
13 gently shaking. Nanobody candidates were applied in PBS supplemented with 1.5% BSA and  
14 0.05% Triton X-100 for 2h at RT with gentle shaking. After staining, several washing steps  
15 using PBS were carried out including DAPI short staining. Coverslips were shortly rinsed in  
16 distilled water and mounted using Mowiol (12 ml of 0.2 M Tris buffer, 6 ml distilled water, 6  
17 g glycerol, 2.4 g Mowiol 4-88, Merck Millipore). Samples were imaged directly or within the  
18 next 48h, samples were kept at 4°C. Primary hippocampal neuronal cultures (15 DIV) imaged  
19 in Fig. 1c and Fig.3 were first fixed with 4% PFA solution for 30 minutes at RT and quenched  
20 with 0.1 M glycine (Merck) solution in PBS for 15 minutes at RT. Samples were permeabilized  
21 and blocked with PB buffer (1.5% BSA and 0.05% Triton X-100 in PBS at pH 7.4) for 40  
22 minutes at RT. For immunostaining, mouse monoclonal anti-Synaptotagmin 1 (#105011,  
23 SySy) recognized by conventional secondary Ab conjugated to Cy3 (1:500, #115-005-166,  
24 JIR; for Fig. 1) or for Fig. 3a and g, the anti- $\alpha$ -Tubulin primary Ab (#302211, SySy) was pre-  
25 mixed with FluoTag-X2 anti mouse IgG1 coupled to Atto488 (#N2002, NanoTag  
26 Biotechnologies) initially in 20  $\mu$ l of PBS and after 30 minutes at RT, 980 $\mu$ l of PBS was added  
27 to bring the concentration of Ab and nanobody to 7 and 15 nM respectively. Into this pre-  
28 mixture tube, 25 nM of FluoTag-X2 anti-PSD95 coupled to AbberiorStar580 (#N3702,  
29 NanoTag Biotechnologies) and 25 nM NbSyt1 coupled to AbberiorStar635p were added.  
30 Samples were incubated for 1 hour at RT under slow orbital stirring. Neurons were washed 3x  
31 with PBS and rinsed once with high salt PBS (0.5 M NaCl). Samples were finally rinsed in  
32 water and mounted on glass slide using Mowiol. For DNA-PAINT imaging (Fig. 3b, c, d, e  
33 and f) immunostaining was performed using ~50 nM of the NbSyt1 functionalized with the  
34 docking DNA strand P3 coupled to Atto488 on its 3'-end (NbSyt1-P3-Atto488).  
35 Simultaneously, post-synapses were labelled with 50 nM of FluoTag-X2 anti-PSD95 (#N3702,  
36 NanoTag Biotechnologies) functionalized with the docking DNA strand R4 on its 3'-end  
37 (NbPSD95-R4). After immunostaining, samples were post-fixed with 4% PFA for 15 minutes,  
38 quenched with 0.1 M Glycine and stored in PBS in 4 °C until imaged.

39  
40 **Crystallization and structure determination.** NbSyt1 was incubated with the cytosolic  
41 C2A<sub>(140-265)</sub> domain of Synaptotagmin 1 at 1:1 molar ratio and concentrated to 65 mg/ml using  
42 3000 Da cut-off spin columns at 4°C, prior to setting sitting-drop crystallization plates. Crystals  
43 of the NbSyt1-Synaptotagmin 1 complex suitable for data collection were found in the G8  
44 condition from the JCSG+ screen (Molecular Dimensions), containing 0.15 M Di-Malic acid

1 pH 7.0, 20% PEG 3350 at 1:1 volume ratio with the protein solution. Crystals were frozen and  
2 data collection was performed at the BioMAX beamline, MAX IV (Lund, Sweden)<sup>46</sup>. The data  
3 were processed using XDS<sup>47</sup>, molecular replacement was performed with Phaser<sup>48</sup> using  
4 structures 5T0R<sup>49</sup> and 6I2G<sup>32</sup> as search models. The structure was built using Coot<sup>50</sup> and  
5 refined in Phenix<sup>51</sup>. Data collection and refinement statistics are shown in Supp. Table 1.

6  
7 **Live intrabody imaging and electrical stimulation in hippocampal neurons.** Images were  
8 taken by an inverted Nikon Ti epifluorescence microscope (Nikon Corporation, Japan)  
9 equipped with a Plan Apochromat 60×, 1.4 NA oil immersion objective, an IXON X3897  
10 Andor camera, an Oko Touch Environmental control and NIS-Elements software.

11 *Live imaging of intrabodies:* Rat hippocampal neurons (DIV ~11) were transduced with an  
12 adeno-associated virus (AAV) containing the sequence for expression of directly fluorescently  
13 labelled (mScarlet or mNeonGreen) intrabodies (iNbSyt1-ALFA / iNbALFA-3xFLAG) and  
14 imaged live 3-4 days post-infection. Transduced neurons were placed onto a custom-built live-  
15 imaging chamber and imaged in Tyrode's solution (124 mM NaCl, 5 mM KCl, 30 mM glucose,  
16 25 mM Hepes, 2 mM CaCl<sub>2</sub> and 1 mM MgCl<sub>2</sub> at pH 7.4) at ~0.2 frames per second (fps).

17 *SynaptopHluorin (SpH):* Rat hippocampal neurons (DIV ~11) were infected with an AAV  
18 holding a bicistronic plasmid for expression of the respective intrabody and SpH. Live imaging  
19 experiments were performed between day 3-5 post-infection. Transduced neurons were placed  
20 onto a custom-built live-imaging chamber and imaged in Tyrode's solution supplemented with  
21 10 μM cyanquixaline (CNQX, Tocris Bioscience, Cambridge, UK) and 50 μM 2-amino-5-  
22 phosphonopentanoic acid (D-AP5; Tocris Bioscience, Cambridge, UK) to avoid spontaneous  
23 network activation. Neurons underwent field stimulation at 30s (for 3s at 20Hz; i.e., 60 AP)  
24 and for 90s (600 AP) while imaged at a rate of 1 fps. After electrical stimulation, 50 mM NH<sub>4</sub>Cl  
25 was applied to evaluate the total SpH pool<sup>31</sup>.

26 *Calcium imaging:* Rat hippocampal neurons (DIV ~10) were infected with an AAV leading to  
27 expression of the respective intrabody fused to the Ca<sup>2+</sup>-sensor jRCaMP8s/m<sup>19</sup>. Live imaging  
28 experiments were performed between day 4-6 post-infection. Transduced neurons were placed  
29 onto a custom-built live-imaging chamber and imaged in Tyrode's solution. For the assessment  
30 of spontaneous network activity, neurons were imaged for 60s in the absence of blockers. For  
31 responses following field stimulation, the Tyrode's solution was supplemented with 10 μM  
32 CNQX and 50 μM D-AP5 to avoid spontaneous network activation. Neurons underwent field  
33 stimulation at 20Hz using one field stimulation (one action potential, 1AP) or 3APs. Images  
34 were taken at a rate of 15 fps.

35 The analysis of images with these sensors was performed using Fiji/imageJ<sup>52</sup>. For synaptic  
36 endocytosis, briefly, based on the total content of SVs (signal uncovered with NH<sub>4</sub>Cl  
37 treatment), regions of interest were set and fluorescence intensity measured and averaged for  
38 each time point per image. These averaged time courses then were normalized to fluorescent  
39 intensities directly preceding the respective stimulation trigger, bleach corrected and peak  
40 aligned. For jRCaMP8s analyses, the responding boutons were identified at the end of the  
41 movie applying 300 APs. The ΔF/F was calculated measuring the basal fluorescence, averaging  
42 the fluorescence for at least 5 time points before each stimulation. This basal initial  
43 fluorescence (F) was used to calculate the ΔF (corresponding to the fluorescence at each time

1 point from which the initial fluorescence  $F$  was subtracted), divided by  $F$ . This  $\Delta F/F$  is to  
2 account for possible small differences in the expression of the sensors across different cells.

3  
4 **Confocal & STED microscopy.** Images from mounted samples in Mowiol and expanded gels  
5 in a custom-made chamber were acquired using STED Expert line microscope (Abberior  
6 Instruments). The microscopy setup was comprised of an IX83 inverted microscope (Olympus)  
7 equipped with UPLSAPO 100x 1.4 NA oil immersion objective (Olympus). In addition, 488  
8 nm, 561 nm and 640 nm lasers were used for confocal imaging. High-resolved images were  
9 obtained from the same setup using the 595 nm and 775 nm pulsed STED depletion lasers in  
10 combination. Images were analyzed in Fiji/ImageJ (v. 1.53o).

11  
12 **Structured Illumination Microscopy (SIM).** Imaging was performed on the Elyra 7 (Zeiss)  
13 with Lattice SIM<sup>2</sup> microscope equipped with a Plan-Apochromat 63x 1.4 NA oil immersion  
14 objective (Zeiss). Highly resolved 3D 3-coloured images were acquired on 80 x 80  $\mu\text{m}$  field of  
15 view after overlapping 40 z-stacks. For that, glass slides of immunostained neurons mounted  
16 in Mowiol were excited with 642nm, 561nm and 488nm laser wavelengths. Image  
17 reconstruction and analysis took place in the ZEN software (Zeiss), after acquiring several  
18 frames from each z-stack.

19  
20 **Exchange-PAINT and FL-PAINT imaging and data analysis.** Both Exchange-PAINT and  
21 FL-PAINT measurements were performed on a custom-built confocal setup<sup>53</sup>. The imaging  
22 chamber was fixed with clips to the microscope's stage and a PDMS layer was used as top  
23 cover. Prior to the super-resolution imaging, an area of 80  $\mu\text{m}$   $\times$  80  $\mu\text{m}$  was scanned and then  
24 a suitable region for imaging was selected based on the NbSyt1-Atto488 signal. Typically, 20k  
25 scan images with virtual pixel size of 100 nm and pixel dwelling time of 2.5  $\mu\text{s}$  were recorded.  
26 The total acquisition time was around 45 minutes for a 20  $\mu\text{m}$   $\times$  20  $\mu\text{m}$  scan region. The laser  
27 power was adjusted according to the sample brightness. In FL-PAINT experiments, a mix of  
28 imager DNA strands R4-Atto550 (5'-TGTGTGT-Atto550-3'), which labeled the NbPSD95  
29 and P3-Cy3B (5'-GTAATGAAGA-Cy3B-3'), which labeled NbSyt1, were used at a final  
30 concentration of 0.1 nM each in PBS buffer including 500 mM NaCl. For Exchange-PAINT  
31 imaging, the solutions exchange in experimental chamber has been realized using custom-built  
32 microfluidics system<sup>21</sup>. First, R4 imager DNA strand was diluted in PBS buffer including 500  
33 mM NaCl to the final imaging concentration of 0.1 nM. After imaging the first target, the  
34 imager was washed away from the chamber by flushing the chamber with PBS buffer. Then,  
35 the imaging buffer with the next imager was introduced into the chamber and the next imaging  
36 round has been performed. In Exchange-PAINT and FL-PAINT data analysis, we chose a time  
37 binning of three scanned frames, corresponding to the time bin of 0.3 s, while the scan region  
38 was 20  $\mu\text{m}$   $\times$  20  $\mu\text{m}$ . The detection of emitter candidates and its sub-pixel localization were  
39 performed using a cross-correlation algorithm and pixel-integrated Gaussian MLE fitting<sup>22</sup>.  
40 Blinking events detected in a single frame were discarded. Out-of-focus localizations with  
41 point spread function (PSF) width of more than 180 nm or/and a number of detected photons  
42 in a single event smaller than 100 were rejected. For lifetime determination, we discarded the  
43 first 0.1 ns after the maximum of the TCSPC histograms, and tail-fitted the remained curve of  
44 a histogram with a mono-exponential function using a maximum likelihood estimator (MLE).

1 Lifetime values in the range from 0.5 to 5.0 ns were included in the analysis. Subsequently, a  
2 drift correction was applied, and finally DNA PAINT images were reconstructed. The  
3 following average localization precision values were calculated: 11.9 nm for Figure 3c, 13.6  
4 and 8.4 nm for Figure 3f (P3 and R4 imagers). For targets crosstalk estimation in the FL-PAINT  
5 imaging in Fig 3c, we fitted the lifetime histograms with two-Gaussian function and determined  
6 lifetime threshold values manually to separate between the two different targets. Then, we  
7 calculated the total crosstalk as the total number of localizations in-between thresholds (wrong  
8 attribution), divided by the total number of localizations beyond thresholds (correct  
9 attribution), as shown in Supp. Figure 4.

10  
11 **Expansion Microscopy.** Primary hippocampal neurons were washed once with pre-warmed  
12 PBS (37°C) and fixed using 4% PFA solution for 10 minutes at 4°C and then for 30 minutes at  
13 RT. Unreacted aldehydes were quenched with 100 mM NH<sub>4</sub>Cl in PBS for 20 minutes at RT.  
14 Neurons were washed three times with permeabilization and blocking (PB) buffer (2% BSA,  
15 0.1% Triton-X 100 in PBS). For immunolabeling, NbSyt1 equipped with anchoring cassettes  
16 and AbberiorStar635p together with nanobody anti- PSD95 (FluoTag-X2 anti-PSD95,  
17 #N3705; NanoTag Biotechnologies) conjugated to sulfo-AlexaFluor488 were used at 20 nM  
18 in PB buffer for 1h at RT. Excessive probes were washed with PB buffer and then samples  
19 were postfixed using 4% PFA in PBS for 10 min at RT followed by quenching with 100 mM  
20 NH<sub>4</sub>Cl in PBS for 15 minutes at RT. Next, samples were undergone 10x Expansion<sup>26</sup> with  
21 some modifications. In Brief: Acryloyl-X (#A20770, ThermoFisher) stock solution (5 mg) was  
22 diluted in DMSO reaching the concentration of 10 mg/ml (pH: 8) followed by further dilution  
23 to 0.3 mg/ml in PBS and 500 µl was added on the cells. Samples were incubated overnight at  
24 RT in the dark and washed with PBS before subjected to gelation. Fresh monomer solution  
25 (MS) was prepared by adding 1.335g N,N-Dimethylacrylamide (DMAA, #274135, Sigma)  
26 stock solution and 0.32g sodium acrylate (SA, #408220, Sigma) in 2.85 ml of ddH<sub>2</sub>O.  
27 Potassium persulfate solution (KPS) was freshly prepared at a stock of 36 mg/ml and added at  
28 3.6 mg/ml in degassed ice-cold MS, protected from light. For the gelation reaction 4 µl TEMED  
29 (#T7024, Sigma) was added to 1 ml of KPS/MS solution, vortexed and a droplet (90 µl) was  
30 immediately spotted on parafilm. Thereafter, samples were placed with cells down on the  
31 droplet and left for ~24h at ~23°C until the gel was fully polymerized. For Homogenization,  
32 gel was detached from the parafilm, transferred into a glass petri dish and was incubated with  
33 the disruption buffer (5% Triton-X and 1% SDS in 100 mM TRIS, pH 8.0) for 2 hours with  
34 disruption buffer exchange at 30 min intervals. Next, samples were autoclaved for 20 minutes  
35 at 121°C in disruption buffer and gels were transferred into 120mm square petri dish filled with  
36 ddH<sub>2</sub>O and expanded by exchanging the water every 30-60 minutes 4-5 times. Expanded gels  
37 were left overnight in water and placed in custom-made chamber for imaging.

38  
39 **Molecular biology.** Sequences for intrabody expression were synthesized (ThermoFischer)  
40 fused to a C-terminal ALFA-tag and cloned into an AAV backbone<sup>54</sup>, which additionally  
41 contained an expression cassette for Synpatobrevin2-pHluorin (Synaptophluorin or SpH).  
42 Both genes, the intrabody and the SpH are under the control of a hSyn1-promoter. For the  
43 constructs used in calcium imaging, the first hSyn1-promoter together with the Vamp2-  
44 pHluorin cassette was removed. Subsequently, the desired sequence for jGCaMP8s/m was



1 cloned in frame to NbSyt1-ALFA or NbALFA-3xFLAG by restriction sites for AgeI and AscI.  
2 For live imaging of the intrabodies NbSyt1 (iNbSyt1) and NbALFA (iNbALFA), the nanobody  
3 sequences were fused to mScarlet or mNeonGreen. Fluorescent proteins were amplified with  
4 the following primers (forward: TCCACCGGTACCATGGTGAGCAAGGGCGAGG and  
5 reverse: ATTGGCGCGCCTCTTGTACAGCTCGTCCATGCC) to introduce the restriction  
6 sites AgeI and AscI and cloned into the AAV backbone containing the iNbSyt1-ALFA or  
7 iNbALFA-3xFLAG.

8  
9 **Adeno-associated viruses (AAVs).** The AAVs were generated as previously described<sup>54,55</sup>.  
10 AAVs were produced in HEK293T cells by co-transfection of pHelper plasmids (pFΔ6, pRV1,  
11 p21) and pAAV target plasmid in a 4:1:1:2 molar ratio by use of Lipofectamine 2000  
12 (ThermoFisher) according to company protocol. 72 h post transfection, cells were harvested  
13 and lysed by 3 cycles of thawing and freezing followed by treatment with benzoase nuclease  
14 (Millipore). After pelleting down cell debris (16.9 g/rcf, 30 minutes at 4°C), supernatants were  
15 filtered, aliquoted and snap frozen in liquid nitrogen, before viruses were stored at -80°C until  
16 used.

## 17 **Electrophysiology**

18 All experimental procedures were carried out in accordance with the EU Council Directive  
19 2010/63/EU and were approved by the local Committee for Ethics and Animal Research  
20 (Landesverwaltungsamt Sachsen-Anhalt, Germany). Electrophysiology was performed on  
21 primary hippocampal cells infected with AAV encoding for the intrabody and SpH from  
22 DIV14-18 under visual control using oblique illumination on a Slicecope Pro2000 (Scientifica,  
23 Uckfield, East Sussex, UK). Prior to recordings, expression was verified pHluorin  
24 fluorescence. Whole-cell voltage-clamp recordings were performed using a MultiClamp 700B  
25 amplifier, filtered at 8 kHz and digitized at 20 kHz using a Digidata 1550A digitizer (Molecular  
26 Devices). Extracellular Tyrode solution, adjusted to pH 7.4 and 300 mOsm, contained: 150  
27 mM of NaCl, 4 mM of KCl, 1.25 mM of MgCl<sub>2</sub>.6H<sub>2</sub>O, 10 mM of glucose, 10 mM of HEPES,  
28 2 mM of Ca<sup>2+</sup>, and 1 μM of tetrodotoxin (TTX). Intracellular pipette solution for voltage clamp  
29 recordings, adjusted to pH 7.3 and 285 mOsm, contained: 115 mM of Cs-methanesulphonate,  
30 10 mM of CsCl, 5 mM of NaCl, 10 mM of HEPES, 20 mM of TEA.Cl hydrate, 4 mM of  
31 MgATP, 0.3 mM of GTP, 0.6 mM of EGTA, and 10 mM of QX314. Whole-cell recordings  
32 were carried out at -60 mV (reversal potential of GABAA receptors) for mEPSCs and 0 mV  
33 (reversal potential of AMPA and NMDA receptors) for mIPSCs. For statistical analysis (Fig.  
34 7), two-tailed unpaired Mann-Whitney U test was performed. It is a nonparametric test in which  
35 the sample medians are compared based on the shape of distribution between the two  
36 independent groups. To correct significance level, a Bonferroni correction was then employed.  
37 The resulting box plots display the median and the first and third quartile with whiskers  
38 extending to 1.5 times the interquartile range above and below the upper and lower quartiles,  
39 respectively ( $Q1 - 1.5 * IQR$  or  $Q3 + 1.5 * IQR$ ).

40

41

42

43

44

## **Acknowledgments**

1 FO was supported by Deutsche Forschungsgemeinschaft (DFG) through the SFB1286 (project  
2 Z04). EFF was supported by a Schram Stiftung (T0287/35359/2020) and a Deutsche  
3 Forschungsgemeinschaft (DFG) grant (FO 1342/1-3). EFF also acknowledges the support of  
4 the Collaborative Research Center 1286 on Quantitative Synaptologie (CRC/SFB1286),  
5 Göttingen, Germany. PS and MMC acknowledge the MAX IV Laboratory for time on  
6 Beamline BioMAX under Proposal 20190233. Research conducted at MAX IV, a Swedish  
7 national user facility, is supported by the Swedish Research Council under contract 2018-  
8 07152, the Swedish Governmental Agency for Innovation Systems under contract 2018-04969  
9 and Formas under contract 2019-02496. This work was supported by grants from the Novo  
10 Nordisk Foundation (NNF20OC0064789), the Swedish Research Council (2022-03681) and  
11 the Swedish Cancer Society (20 1287 PjF) to PS. MP and HH were supported by the Leibniz  
12 “Best Minds” program and the Center for Behavioral Brain Sciences (CBBS). We thank Silvio  
13 Rizzoli for critical reading of the manuscript and Christina Zeising, Nicole Hartelt and  
14 Christina Patzelt for the excellent technical help.

### 16 **Author contributions**

17 KQZVR, NM, RR and SSI designed, performed and analyses most of the experiments. LA  
18 helped with calcium imaging and its analysis, AMR and KAS planned and performed ExM. MM  
19 initiated the phage-display screenings, JH produced and conjugated proteins. MMC and PS  
20 planned, performed and analyzed the structural biology work. HH and MP planned, performed  
21 and analyzed electrophysiology data. NO and RT helped with imaging and analysis of  
22 Exchange PAINT and FL-PAINT. EFF, designed and guided experiments, performed analysis  
23 and wrote the manuscript. FO conceived and lead the project, designed performed and guided  
24 experiments, analyzed data, and wrote the manuscript. All authors contribute with writing.

### 26 **Competing interests**

27 FO is a shareholder of NanoTag Biotechnologies GmbH. All other authors declare no  
28 competing interests.

### 30 **References**

- 31 1. Jahn, R. & Scheller, R. H. SNAREs — engines for membrane fusion. *Nat Rev Mol Cell Bio* **7**, 631–  
32 643 (2006).
- 33 2. Stein, A., Weber, G., Wahl, M. C. & Jahn, R. Helical extension of the neuronal SNARE complex  
34 into the membrane. *Nature* **460**, 525–528 (2009).
- 35 3. Wilhelm, B. G. *et al.* Composition of isolated synaptic boutons reveals the amounts of vesicle  
36 trafficking proteins. *Science (New York, NY)* **344**, 1023–1028 (2014).
- 37 4. Takamori, S. *et al.* Molecular anatomy of a trafficking organelle. *Cell* **127**, 831–846 (2006).
- 38 5. Stepien, K. P. & Rizo, J. Synaptotagmin-1-, Munc18-1-, and Munc13-1-dependent liposome fusion  
39 with a few neuronal SNAREs. *Proc National Acad Sci* **118**, e2019314118 (2021).
- 40 6. Bykhovskaia, M. SNARE complex alters the interactions of the Ca<sup>2+</sup> sensor synaptotagmin 1 with  
41 lipid bilayers. *Biophys J* **120**, 642–661 (2021).
- 42 7. Ramakrishnan, S., Bera, M., Coleman, J., Rothman, J. E. & Krishnakumar, S. S. Synergistic roles of  
43 Synaptotagmin-1 and complexin in calcium-regulated neuronal exocytosis. *Elife* **9**, e54506 (2020).
- 44 8. Courtney, K. C. *et al.* Synaptotagmin 1 oligomerization via the juxtamembrane linker regulates  
45 spontaneous and evoked neurotransmitter release. *P Natl Acad Sci Usa* **118**, e2113859118 (2021).
- 46 9. Voleti, R., Jaczynska, K. & Rizo, J. Ca<sup>2+</sup>-dependent release of synaptotagmin-1 from the SNARE  
47 complex on phosphatidylinositol 4,5-bisphosphate-containing membranes. *Elife* **9**, e57154 (2020).
- 48 10. Martens, S., Kozlov, M. M. & McMahon, H. T. How Synaptotagmin Promotes Membrane Fusion.  
49 *Science* **316**, 1205–1208 (2007).
- 50 11. Kuo, W., Herrick, D. Z., Ellena, J. F. & Cafiso, D. S. The Calcium-Dependent and Calcium-  
51 Independent Membrane Binding of Synaptotagmin 1: Two Modes of C2B Binding. *J Mol Biol* **387**,  
52 284–294 (2009).

- 1 12. Wang, J. *et al.* Calcium sensitive ring-like oligomers formed by synaptotagmin. *Proc National Acad Sci* **111**, 13966–13971 (2014).
- 2
- 3 13. Tang, J. *et al.* A Complexin/Synaptotagmin 1 Switch Controls Fast Synaptic Vesicle Exocytosis. *Cell* **126**, 1175–1187 (2006).
- 4
- 5 14. Nyenhuis, S. B. *et al.* Conserved arginine residues in synaptotagmin 1 regulate fusion pore
- 6 expansion through membrane contact. *Nat Commun* **12**, 761 (2021).
- 7 15. Park, Y. *et al.* Synaptotagmin-1 binds to PIP2-containing membrane but not to SNAREs at
- 8 physiological ionic strength. *Nat Struct Mol Biol* **22**, 815–823 (2015).
- 9 16. Brose, N. *et al.* Synaptic vesicle fusion: today and beyond. *Nat Struct Mol Biol* **26**, 663–668 (2019).
- 10 17. Nagy, G. *et al.* Different Effects on Fast Exocytosis Induced by Synaptotagmin 1 and 2 Isoforms
- 11 and Abundance But Not by Phosphorylation. *J Neurosci* **26**, 632–643 (2006).
- 12 18. Fergestad, T. & Broadie, K. Interaction of stoned and synaptotagmin in synaptic vesicle endocytosis. *J Neurosci Official J Soc Neurosci* **21**, 1218–27 (2001).
- 13
- 14 19. Zhang, Y. *et al.* Fast and sensitive GCaMP calcium indicators for imaging neural populations. *Biorxiv* 2021.11.08.467793 (2021) doi:10.1101/2021.11.08.467793.
- 15
- 16 20. Jungmann, R. *et al.* Multiplexed 3D cellular super-resolution imaging with DNA-PAINT and
- 17 Exchange-PAINT. *Nature methods* **11**, 313–318 (2014).
- 18 21. Sograte-Idrissi, S. *et al.* Nanobody Detection of Standard Fluorescent Proteins Enables Multi-Target
- 19 DNA-PAINT with High Resolution and Minimal Displacement Errors. *Cells* **8**, 48 (2019).
- 20 22. Oleksievets, N. *et al.* Fluorescence lifetime DNA-PAINT for multiplexed super-resolution imaging
- 21 of cells. *Commun Biology* **5**, 38 (2022).
- 22 23. Dani, A., Huang, B., Bergan, J., Dulac, C. & Zhuang, X. Superresolution imaging of chemical
- 23 synapses in the brain. *Neuron* **68**, 843–856 (2010).
- 24 24. Sograte-Idrissi, S. *et al.* Circumvention of common labelling artefacts using secondary nanobodies. *Nanoscale* **12**, 10226–10239 (2020).
- 25
- 26 25. Gao, M. *et al.* Expansion Stimulated Emission Depletion Microscopy (ExSTED). *ACS nano* (2018)
- 27 doi:10.1021/acsnano.8b00776.
- 28 26. Truckenbrodt, S. *et al.* X10 expansion microscopy enables 25-nm resolution on conventional
- 29 microscopes. *EMBO reports* (2018) doi:10.15252/embr.201845836.
- 30 27. Rothbauer, U. *et al.* Targeting and tracing antigens in live cells with fluorescent nanobodies. *Nature*
- 31 *methods* **3**, 887–889 (2006).
- 32 28. Gerdes, C. *et al.* A nanobody-based fluorescent reporter reveals human  $\alpha$ -synuclein in the cell
- 33 cytosol. *Nat Commun* **11**, 2729 (2020).
- 34 29. Bindels, D. S. *et al.* mScarlet: a bright monomeric red fluorescent protein for cellular imaging. *Nature methods* **11**, 121–122 (2016).
- 35
- 36 30. Shaner, N. C. *et al.* A bright monomeric green fluorescent protein derived from Branchiostoma
- 37 lanceolatum. *Nat Methods* **10**, 407–409 (2013).
- 38 31. Sankaranarayanan, S., Angelis, D. D., Rothman, J. E. & Ryan, T. A. The Use of pHluorins for
- 39 Optical Measurements of Presynaptic Activity. *Biophys J* **79**, 2199–2208 (2000).
- 40 32. Götzke, H. *et al.* The ALFA-tag is a highly versatile tool for nanobody-based bioscience
- 41 applications. *Nat Commun* **10**, 4403 (2019).
- 42 33. Ries, J., Kaplan, C., Platonova, E., Eghlidi, H. & Ewers, H. a simple, versatile method for GFP-
- 43 based super-resolution microscopy via nanobodies. *Nature methods* 1–6 (2012)
- 44 doi:10.1038/nmeth.1991.
- 45 34. Mikhaylova, M. *et al.* Resolving bundled microtubules using anti-tubulin nanobodies. *Nat Commun*
- 46 **6**, 7933 (2015).
- 47 35. Castro, M. A. G. de *et al.* Differential organization of tonic and chronic B cell antigen receptors in
- 48 the plasma membrane. *Nat Commun* **10**, 820 (2019).
- 49 36. Thevathasan, J. V. *et al.* Nuclear pores as versatile reference standards for quantitative
- 50 superresolution microscopy. *Nat Methods* **16**, 1045–1053 (2019).
- 51 37. Ganji, M., Schlichthaerle, T., Eklund, A. S., Strauss, S. & Jungmann, R. Quantitative Assessment
- 52 of Labeling Probes for Super-Resolution Microscopy Using Designer DNA Nanostructures. *Chemphyschem* **22**, 911–914 (2021).
- 53
- 54 38. Lelek, M. *et al.* Single-molecule localization microscopy. *Nat Rev Methods Primers* **1**, 39 (2021).

- 1 39. Fornasiero, E. F. *et al.* Precisely measured protein lifetimes in the mouse brain reveal differences  
2 across tissues and subcellular fractions. *Nat Commun* **9**, 4230 (2018).
- 3 40. Hamers-Casterman, C. *et al.* Naturally occurring antibodies devoid of light chains. *Nature* **363**,  
4 446–448 (1993).
- 5 41. Pardon, E. *et al.* A general protocol for the generation of Nanobodies for structural biology. *Nature*  
6 *Protocols* **9**, 674–693 (2014).
- 7 42. Maidorn, M., Olichon, A., Rizzoli, S. O. & Opazo, F. Nanobodies reveal an extra-synaptic  
8 population of SNAP-25 and Syntaxin 1A in hippocampal neurons. *Mabs* **11**, 305–321 (2018).
- 9 43. Agasti, S. S. *et al.* DNA-barcoded labeling probes for highly multiplexed Exchange-PAINT  
10 imaging. *Chemical science* **8**, 3080–3091 (2017).
- 11 44. Strauss, S. & Jungmann, R. Up to 100-fold speed-up and multiplexing in optimized DNA-PAINT.  
12 *Nat Methods* **17**, 789–791 (2020).
- 13 45. Goslin, K., Asmussen, H. & Banker, G. Rat Hippocampal Neurons in Low-Density Culture.  
14 *Culturing Nerve Cells* 0 (1998) doi:10.7551/mitpress/4913.003.0020.
- 15 46. Ursby, T. *et al.* BioMAX – the first macromolecular crystallography beamline at MAX IV  
16 Laboratory. *J Synchrotron Radiat* **27**, 1415–1429 (2020).
- 17 47. Kabsch, W. XDS. *Acta Crystallogr Sect D Biological Crystallogr* **66**, 125–132 (2010).
- 18 48. McCoy, A. J. *et al.* Phaser crystallographic software. *J Appl Crystallogr* **40**, 658–674 (2007).
- 19 49. Katti, S. *et al.* Non-Native Metal Ion Reveals the Role of Electrostatics in Synaptotagmin 1–  
20 Membrane Interactions. *Biochemistry-us* **56**, 3283–3295 (2017).
- 21 50. Emsley, P., Lohkamp, B., Scott, W. G. & Cowtan, K. Features and development of Coot. *Acta*  
22 *Crystallogr Sect D Biological Crystallogr* **66**, 486–501 (2010).
- 23 51. Liebschner, D. *et al.* Macromolecular structure determination using X-rays, neutrons and electrons:  
24 recent developments in Phenix. *Acta Crystallogr Sect D* **75**, 861–877 (2019).
- 25 52. Schindelin, J. *et al.* Fiji: an open-source platform for biological-image analysis. *Nat Methods* **9**,  
26 676–682 (2012).
- 27 53. Thiele, J. C. *et al.* Confocal Fluorescence-Lifetime Single-Molecule Localization Microscopy. *Acs*  
28 *Nano* **14**, 14190–14200 (2020).
- 29 54. Keihani, S. *et al.* The long noncoding RNA neuroLNC regulates presynaptic activity by interacting  
30 with the neurodegeneration-associated protein TDP-43. *Sci Adv* **5**, eaay2670 (2019).
- 31 55. Malik, J. M. I., Shevtsova, Z., Bähr, M. & Kügler, S. Long-term in vivo inhibition of CNS  
32 neurodegeneration by Bcl-XL gene transfer. *Mol Ther* **11**, 373–381 (2005).
